# Supplementary material for: tidytcells: standardizer for TR/MH nomenclature
Source: Frontiers journal article supplement (doi:10.3389/fimmu.2023.1276106), 2023-10-25
Supplement: Data_Sheet_2.ZIP [file Data_Sheet_2.ZIP]

# test\_iedb

September 26, 2023

## 1 Practical test of standardiser coverage on IEDB data

### 1.1 Setup

```
[ ]: import gzip
      from itertools import product
      import json
      import pandas as pd
      from pandas import isna
      import tidytcells
```

```
[ ]: with gzip.open("iedb_species_decoder.json.gz", "r") as f:
      species_decoder = json.load(f)
```

```
[ ]: df = pd.read_csv("iedb.csv.zip")
      df = df[df["Response Type"] == "T cell"]
```

/tmp/ipykernel\_8270/1899971150.py:1: DtypeWarning: Columns (8,10,12,14,16,17,18,19,20,21,22,23,24,25,26,31,32,37,38,45,46,47,48,49,50,51,52,53,54,60,61,66,67) have mixed types. Specify dtype option on import or set low\_memory=False.

```
df = pd.read_csv("iedb.csv.zip")
```

```
[ ]: df.head()
```

```
[ ]:      Group Receptor ID  Receptor ID      Reference IRI \
145          47          57  http://www.iedb.org/reference/1004539
146          47          57  http://www.iedb.org/reference/1004539
147         8493          58  http://www.iedb.org/reference/1004580
148         8493          58  http://www.iedb.org/reference/1004580
149         8493          58  http://www.iedb.org/reference/1017865
```

```
      Epitope IRI Description \
145  http://www.iedb.org/epitope/69921  VMAPRTLIL
146  http://www.iedb.org/epitope/69921  VMAPRTLIL
147  http://www.iedb.org/epitope/16878  FLRGRAYGL
148  http://www.iedb.org/epitope/144889  FLRGRFYGL
149  http://www.iedb.org/epitope/142137  EEYLQAFTY
```

|     | Antigen \                                         |
|-----|---------------------------------------------------|
| 145 | HLA class I histocompatibility antigen, Cw-3 a... |
| 146 | HLA class I histocompatibility antigen, Cw-3 a... |
| 147 | nuclear antigen EBNA-3                            |
| 148 | NaN                                               |
| 149 | ATP-binding cassette sub-family D member 3        |

|     | Organism                                 | Response | Type \ |
|-----|------------------------------------------|----------|--------|
| 145 | Homo sapiens (human)                     |          | T cell |
| 146 | Homo sapiens (human)                     |          | T cell |
| 147 | Human herpesvirus 4 (Epstein Barr virus) |          | T cell |
| 148 | NaN                                      |          | T cell |
| 149 | Homo sapiens (human)                     |          | T cell |

|     | Assay IDs                 | MHC Allele Names ... \       |
|-----|---------------------------|------------------------------|
| 145 | 1548960, 1583178          | HLA-E*01:01, HLA-E*01:03 ... |
| 146 | 1583178                   | HLA-E*01:03 ...              |
| 147 | 1814845, 1814846, 1814847 | HLA-B8 ...                   |
| 148 | 1831737                   | HLA-B8 ...                   |
| 149 | 1778798                   | HLA-B*44:05 ...              |

|     | Chain 2 CDR1 Start Curated | Chain 2 CDR1 End Curated \ |
|-----|----------------------------|----------------------------|
| 145 | NaN                        | NaN                        |
| 146 | NaN                        | NaN                        |
| 147 | NaN                        | NaN                        |
| 148 | NaN                        | NaN                        |
| 149 | NaN                        | NaN                        |

|     | Chain 2 CDR1 Start Calculated | Chain 2 CDR1 End Calculated \ |
|-----|-------------------------------|-------------------------------|
| 145 | 25.0                          | 29.0                          |
| 146 | 25.0                          | 29.0                          |
| 147 | 25.0                          | 29.0                          |
| 148 | 25.0                          | 29.0                          |
| 149 | 25.0                          | 29.0                          |

|     | Chain 2 CDR2 Curated | Chain 2 CDR2 Calculated | Chain 2 CDR2 Start Curated \ |
|-----|----------------------|-------------------------|------------------------------|
| 145 | NaN                  | FVKESK                  | NaN                          |
| 146 | NaN                  | FVKESK                  | NaN                          |
| 147 | NaN                  | FQNEAQ                  | NaN                          |
| 148 | NaN                  | FQNEAQ                  | NaN                          |
| 149 | NaN                  | FQNEAQ                  | NaN                          |

|     | Chain 2 CDR2 End Curated | Chain 2 CDR2 Start Calculated \ |
|-----|--------------------------|---------------------------------|
| 145 | NaN                      | 47.0                            |
| 146 | NaN                      | 47.0                            |
| 147 | NaN                      | 47.0                            |
| 148 | NaN                      | 47.0                            |

|     |     |      |
|-----|-----|------|
| 149 | NaN | 47.0 |
|-----|-----|------|

|     |                             |
|-----|-----------------------------|
|     | Chain 2 CDR2 End Calculated |
| 145 | 52.0                        |
| 146 | 52.0                        |
| 147 | 52.0                        |
| 148 | 52.0                        |
| 149 | 52.0                        |

[5 rows x 72 columns]

```
[ ]: def rename_species(species):
    if type(species) != str:
        return pd.NA

    if "sapiens" in species.lower():
        return "homosapiens"

    if "musculus" in species.lower():
        return "musmusculus"

    return species

df["Chain 1 Species"] = df["Chain 1 Species"].map(
    lambda x: pd.NA if pd.isna(x) else species_decoder[str(int(x))]
)
df["Chain 1 Species"] = df["Chain 1 Species"].map(rename_species)
```

```
[ ]: tr_gene_symbols = pd.concat(
    [
        df[[" ".join(parts), "Chain 1 Species"]].rename(
            columns={" ".join(parts): "gene", "Chain 1 Species": "species"}
        )
        for parts in product(
            ("Curated", "Calculated"), ("Chain 1", "Chain 2"), ("V Gene", "J_
↳Gene")
        )
    ]
)
tr_gene_symbols = tr_gene_symbols[tr_gene_symbols["gene"].notna()].
↳drop_duplicates()
```

```
[ ]: tr_gene_symbols
```

|     |             |             |
|-----|-------------|-------------|
|     | gene        | species     |
| 145 | TRAV26-1*01 | homosapiens |

|        |             |                     |
|--------|-------------|---------------------|
| 415    | TRAV21*01   | homosapiens         |
| 896    | TRAV26-2*01 | homosapiens         |
| 1524   | TCRAV1-2    | homosapiens         |
| 1835   | TCRAV26-1   | homosapiens         |
| ...    | ...         | ...                 |
| 27260  | TRBJ2-7*01  | synthetic construct |
| 27270  | TRBJ2-1*01  | synthetic construct |
| 38794  | TRBJ2-6*01  | musmusculus         |
| 67860  | TRBJ2-5*01  | Macaca mulatta      |
| 204155 | TRBJ1-6*02  | Gallus gallus       |

[2225 rows x 2 columns]

```
[ ]: junctions = pd.concat(
    [
        df[[" ".join(parts), "Chain 1 Species"]].rename(
            columns={" ".join(parts): "junction", "Chain 1 Species": "species"}
        )
        for parts in product(
            ("Chain 1", "Chain 2"), ("CDR3",), ("Calculated", "Curated")
        )
    ]
)
junctions = junctions[junctions["junction"].notna()].drop_duplicates()
```

```
[ ]: junctions
```

```
[ ]:
      junction      species
145  IVVRSSNTGKLI  homosapiens
187  AASANSPTYQR   musmusculus
190           AAS   musmusculus
205  AALIQAQKLV   homosapiens
321  AVRPLLDGTYIPT homosapiens
...      ...      ...
211479 CSVNRDTGAGGYTF  <NA>
211480 CSVRGQGNPLHF   <NA>
211481  FSARRGSEAFF   <NA>
211482  FSARRGTEAFF   <NA>
211483 RSGTRDVGSYNEQFF  <NA>
```

[305885 rows x 2 columns]

```
[ ]: mh_gene_symbols = df[["MHC Allele Names", "Chain 1 Species"]].rename(
    columns={"MHC Allele Names": "gene", "Chain 1 Species": "species"}
)
mh_gene_symbols = mh_gene_symbols[mh_gene_symbols["gene"].notna()]
mh_gene_symbols["gene"] = mh_gene_symbols["gene"].str.split(", ")
```

```
mh_gene_symbols = mh_gene_symbols.explode("gene")
mh_gene_symbols["gene"] = mh_gene_symbols["gene"].str.split("/")
mh_gene_symbols = mh_gene_symbols.explode("gene")
mh_gene_symbols = mh_gene_symbols.drop_duplicates()
```

```
[ ]: mh_gene_symbols
```

```
[ ]:
      gene      species
145  HLA-E*01:01  homosapiens
145  HLA-E*01:03  homosapiens
147      HLA-B8  homosapiens
149  HLA-B*44:05  homosapiens
150  HLA-B*44:02  homosapiens
...
209423  HLA-DR11  homosapiens
209427  HLA-DQB1*05:02  homosapiens
211262  HLA-DPA1*01:03      <NA>
211262  DPB1*04:01      <NA>
211277  DRB3*02:02      <NA>
```

[284 rows x 2 columns]

```
[ ]: epitopes = df[["Description"]].rename(columns={
    "Description": "epitope"
}).drop_duplicates()
```

```
[ ]: epitopes
```

```
[ ]:
      epitope
145  VMAPRTLIL
147  FLRGRAYGL
148  FLRGRFYGL
149  EEYLQAFTY
154  EEYLKAWTF
...
211266  RSALEDLLFSKV
211277  PITMQCIKHVVGNGNAINELKFHPR
211303  RSLLEDLLFNKVK
211305  RSFVEDLLFDKV
211390  NLLLQYGSFCTQLNRAL
```

[1996 rows x 1 columns]

## 1.2 Test TR standardization

```
[ ]: tr_gene_symbols["corrected"] = tr_gene_symbols.apply(
    lambda row: pd.NA
    if isna(row["gene"])
    else tidytcells.tr.standardise(row["gene"], species="homosapiens" if
    isna(row["species"]) else row["species"]),
    axis=1,
)
```

```
/home/yutanagano/Projects/tidytcells/src/tidytcells/_utils/warnings.py:7:
UserWarning: Failed to standardize "12D-2" for species musmusculus: unrecognised
gene name. Attempted fix: "TR12D-2".
```

```
warn(
```

```
/home/yutanagano/Projects/tidytcells/src/tidytcells/_utils/warnings.py:7:
UserWarning: Failed to standardize "TCRAV1-4" for species homosapiens:
unrecognised gene name. Attempted fix: "TRAV1-4".
```

```
warn(
```

```
/home/yutanagano/Projects/tidytcells/src/tidytcells/_utils/warnings.py:7:
UserWarning: Failed to standardize "TCRAV1-5" for species homosapiens:
unrecognised gene name. Attempted fix: "TRAV1-5".
```

```
warn(
```

```
/home/yutanagano/Projects/tidytcells/src/tidytcells/_utils/warnings.py:7:
UserWarning: Failed to standardize "TCRAV2-3" for species homosapiens:
unrecognised gene name. Attempted fix: "TRAV2-3".
```

```
warn(
```

```
/home/yutanagano/Projects/tidytcells/src/tidytcells/_utils/warnings.py:7:
UserWarning: Failed to standardize "TCRAV9*02" for species homosapiens:
nonexistent allele for recognised gene. Attempted fix: "TRAV9-1*02".
```

```
warn(
```

```
/home/yutanagano/Projects/tidytcells/src/tidytcells/_utils/warnings.py:7:
UserWarning: Failed to standardize "TCRAV2-2" for species homosapiens:
unrecognised gene name. Attempted fix: "TRAV2-2".
```

```
warn(
```

```
/home/yutanagano/Projects/tidytcells/src/tidytcells/_utils/warnings.py:7:
UserWarning: Failed to standardize "TCRAV12-4" for species homosapiens:
unrecognised gene name. Attempted fix: "TRAV12-4".
```

```
warn(
```

```
/home/yutanagano/Projects/tidytcells/src/tidytcells/_utils/warnings.py:7:
UserWarning: Failed to standardize "TCRAV13/1*02 (F)" for species homosapiens:
unrecognised gene name. Attempted fix: "TRAV13/DV1*02".
```

```
warn(
```

```
/home/yutanagano/Projects/tidytcells/src/tidytcells/_utils/warnings.py:7:
UserWarning: Failed to standardize "TCRAV53" for species musmusculus:
unrecognised gene name. Attempted fix: "TRAV53".
```

```
warn(
```

```
/home/yutanagano/Projects/tidytcells/src/tidytcells/_utils/warnings.py:7:
UserWarning: Failed to standardize "TCRAV24*0" for species homosapiens:
```

```

nonexistent allele for recognised gene. Attempted fix: "TRAV24*00".
warn(
/home/yutanagano/Projects/tidytcells/src/tidytcells/_utils/warnings.py:7:
UserWarning: Failed to standardize "mTRDV2-2" for species homosapiens:
unrecognised gene name. Attempted fix: "TRMTRDV2-2".
warn(
/home/yutanagano/Projects/tidytcells/src/tidytcells/_utils/warnings.py:7:
UserWarning: Failed to standardize "TRBV14DV4" for species homosapiens:
unrecognised gene name. Attempted fix: "TRBV14/DV4".
warn(
/home/yutanagano/Projects/tidytcells/src/tidytcells/_utils/warnings.py:7:
UserWarning: Failed to standardize "TRBV23VD6" for species homosapiens:
unrecognised gene name. Attempted fix: "TRBV23VD6".
warn(
/home/yutanagano/Projects/tidytcells/src/tidytcells/_utils/warnings.py:7:
UserWarning: Failed to standardize "TRBV29DV5" for species homosapiens:
unrecognised gene name. Attempted fix: "TRBV29/DV5".
warn(
/home/yutanagano/Projects/tidytcells/src/tidytcells/_utils/warnings.py:7:
UserWarning: Failed to standardize "TRDAV1*01" for species homosapiens:
unrecognised gene name. Attempted fix: "TRDAV1*01".
warn(
/home/yutanagano/Projects/tidytcells/src/tidytcells/_utils/warnings.py:7:
UserWarning: Failed to standardize "TCRVJ9" for species homosapiens:
unrecognised gene name. Attempted fix: "TRVJ9".
warn(
/home/yutanagano/Projects/tidytcells/src/tidytcells/_utils/warnings.py:7:
UserWarning: Failed to standardize "57" for species musmusculus: unrecognised
gene name. Attempted fix: "TR57".
warn(
/home/yutanagano/Projects/tidytcells/src/tidytcells/_utils/warnings.py:7:
UserWarning: Failed to standardize "TCRAV57*01" for species homosapiens:
unrecognised gene name. Attempted fix: "TRAV57*01".
warn(
/home/yutanagano/Projects/tidytcells/src/tidytcells/_utils/warnings.py:7:
UserWarning: Failed to standardize "TRAJ37-2" for species homosapiens:
unrecognised gene name. Attempted fix: "TRAJ37-2".
warn(
/home/yutanagano/Projects/tidytcells/src/tidytcells/_utils/warnings.py:7:
UserWarning: Failed to standardize "TCRAJ1-3" for species homosapiens:
unrecognised gene name. Attempted fix: "TRAJ1-3".
warn(
/home/yutanagano/Projects/tidytcells/src/tidytcells/_utils/warnings.py:7:
UserWarning: Failed to standardize "TCRAJ17-9" for species homosapiens:
unrecognised gene name. Attempted fix: "TRAJ17-9".
warn(
/home/yutanagano/Projects/tidytcells/src/tidytcells/_utils/warnings.py:7:
UserWarning: Failed to standardize "TCRAJ16-5" for species homosapiens:

```

```

unrecognised gene name. Attempted fix: "TRAJ16-5".
warn(
/home/yutanagano/Projects/tidytcells/src/tidytcells/_utils/warnings.py:7:
UserWarning: Failed to standardize "TCRAJ1-8" for species homosapiens:
unrecognised gene name. Attempted fix: "TRAJ1-8".
warn(
/home/yutanagano/Projects/tidytcells/src/tidytcells/_utils/warnings.py:7:
UserWarning: Failed to standardize "TCRAJ3-2" for species homosapiens:
unrecognised gene name. Attempted fix: "TRAJ3-2".
warn(
/home/yutanagano/Projects/tidytcells/src/tidytcells/_utils/warnings.py:7:
UserWarning: Failed to standardize "TCRAJ9-14" for species homosapiens:
unrecognised gene name. Attempted fix: "TRAJ9-14".
warn(
/home/yutanagano/Projects/tidytcells/src/tidytcells/_utils/warnings.py:7:
UserWarning: Failed to standardize "TCRAJ9-7" for species homosapiens:
unrecognised gene name. Attempted fix: "TRAJ9-7".
warn(
/home/yutanagano/Projects/tidytcells/src/tidytcells/_utils/warnings.py:7:
UserWarning: Failed to standardize "TCRAJ17-5" for species homosapiens:
unrecognised gene name. Attempted fix: "TRAJ17-5".
warn(
/home/yutanagano/Projects/tidytcells/src/tidytcells/_utils/warnings.py:7:
UserWarning: Failed to standardize "TCRAJ9-11" for species homosapiens:
unrecognised gene name. Attempted fix: "TRAJ9-11".
warn(
/home/yutanagano/Projects/tidytcells/src/tidytcells/_utils/warnings.py:7:
UserWarning: Failed to standardize "TCRAJ17-11" for species homosapiens:
unrecognised gene name. Attempted fix: "TRAJ17-11".
warn(
/home/yutanagano/Projects/tidytcells/src/tidytcells/_utils/warnings.py:7:
UserWarning: Failed to standardize "TCRAJ431" for species homosapiens:
unrecognised gene name. Attempted fix: "TRAJ431".
warn(
/home/yutanagano/Projects/tidytcells/src/tidytcells/_utils/warnings.py:7:
UserWarning: Failed to standardize "TCRAJ151" for species homosapiens:
unrecognised gene name. Attempted fix: "TRAJ151".
warn(
/home/yutanagano/Projects/tidytcells/src/tidytcells/_utils/warnings.py:7:
UserWarning: Failed to standardize "TCRAJ42-4" for species homosapiens:
unrecognised gene name. Attempted fix: "TRAJ42-4".
warn(
/home/yutanagano/Projects/tidytcells/src/tidytcells/_utils/warnings.py:7:
UserWarning: Failed to standardize "TCRAJ42-2" for species homosapiens:
unrecognised gene name. Attempted fix: "TRAJ42-2".
warn(
/home/yutanagano/Projects/tidytcells/src/tidytcells/_utils/warnings.py:7:
UserWarning: Failed to standardize "TRAJA5.1" for species homosapiens:

```



```

unrecognised gene name. Attempted fix: "TRAJA5-1".
warn(
/home/yutanagano/Projects/tidytcells/src/tidytcells/_utils/warnings.py:7:
UserWarning: Failed to standardize "TRAJ2-7" for species homosapiens:
unrecognised gene name. Attempted fix: "TRAJ2-7".
warn(
/home/yutanagano/Projects/tidytcells/src/tidytcells/_utils/warnings.py:7:
UserWarning: Failed to standardize "TRAVJ4" for species musmusculus:
unrecognised gene name. Attempted fix: "TRAVJ4".
warn(
/home/yutanagano/Projects/tidytcells/src/tidytcells/_utils/warnings.py:7:
UserWarning: Failed to standardize "TRAJ10" for species musmusculus:
unrecognised gene name. Attempted fix: "TRAJ10".
warn(
/home/yutanagano/Projects/tidytcells/src/tidytcells/_utils/warnings.py:7:
UserWarning: Failed to standardize "TRVB13-1*02" for species musmusculus:
unrecognised gene name. Attempted fix: "TRVB13-1*02".
warn(
/home/yutanagano/Projects/tidytcells/src/tidytcells/_utils/warnings.py:7:
UserWarning: Failed to standardize "1" for species musmusculus: unrecognised
gene name. Attempted fix: "TR1".
warn(
/home/yutanagano/Projects/tidytcells/src/tidytcells/_utils/warnings.py:7:
UserWarning: Failed to standardize "TRVB13-2*01" for species musmusculus:
unrecognised gene name. Attempted fix: "TRVB13-2*01".
warn(
/home/yutanagano/Projects/tidytcells/src/tidytcells/_utils/warnings.py:7:
UserWarning: Failed to standardize "TCRBV15-2" for species homosapiens:
unrecognised gene name. Attempted fix: "TRBV15-2".
warn(
/home/yutanagano/Projects/tidytcells/src/tidytcells/_utils/warnings.py:7:
UserWarning: Failed to standardize "TRBV13-2*01" for species homosapiens:
unrecognised gene name. Attempted fix: "TRBV13-2*01".
warn(
/home/yutanagano/Projects/tidytcells/src/tidytcells/_utils/warnings.py:7:
UserWarning: Failed to standardize "TCRB6-2" for species homosapiens:
unrecognised gene name. Attempted fix: "TRB6-2".
warn(
/home/yutanagano/Projects/tidytcells/src/tidytcells/_utils/warnings.py:7:
UserWarning: Failed to standardize "TCRBV13-3" for species homosapiens:
unrecognised gene name. Attempted fix: "TRBV13-3".
warn(
/home/yutanagano/Projects/tidytcells/src/tidytcells/_utils/warnings.py:7:
UserWarning: Failed to standardize "TCRBV3-1 or TCRBV3-2" for species
homosapiens: unrecognised gene name. Attempted fix: "TRBV3-1/ORTRBV3-2".
warn(
/home/yutanagano/Projects/tidytcells/src/tidytcells/_utils/warnings.py:7:
UserWarning: Failed to standardize "TCRBV12-3 or TCRBV12-4" for species

```

```

homosapiens: unrecognised gene name. Attempted fix: "TRBV12-3/ORTRBV12-4".
  warn(
/home/yutanagano/Projects/tidytcells/src/tidytcells/_utils/warnings.py:7:
UserWarning: Failed to standardize "TRBV13-2" for species homosapiens:
unrecognised gene name. Attempted fix: "TRBV13-2".
  warn(
/home/yutanagano/Projects/tidytcells/src/tidytcells/_utils/warnings.py:7:
UserWarning: Failed to standardize "TRBV13-3*01" for species homosapiens:
unrecognised gene name. Attempted fix: "TRBV13-3*01".
  warn(
/home/yutanagano/Projects/tidytcells/src/tidytcells/_utils/warnings.py:7:
UserWarning: Failed to standardize "TRBV13-2*01&nbsp;" for species homosapiens:
unrecognised gene name. Attempted fix: "TRBV13-2*01".
  warn(
/home/yutanagano/Projects/tidytcells/src/tidytcells/_utils/warnings.py:7:
UserWarning: Failed to standardize "TRBV13-3" for species homosapiens:
unrecognised gene name. Attempted fix: "TRBV13-3".
  warn(
/home/yutanagano/Projects/tidytcells/src/tidytcells/_utils/warnings.py:7:
UserWarning: Failed to standardize "TCRBV21-3" for species homosapiens:
unrecognised gene name. Attempted fix: "TRBV21-3".
  warn(
/home/yutanagano/Projects/tidytcells/src/tidytcells/_utils/warnings.py:7:
UserWarning: Failed to standardize "TCRBV13-6" for species homosapiens:
unrecognised gene name. Attempted fix: "TRBV13-6".
  warn(
/home/yutanagano/Projects/tidytcells/src/tidytcells/_utils/warnings.py:7:
UserWarning: Failed to standardize "TCRB17-1" for species homosapiens:
unrecognised gene name. Attempted fix: "TRB17-1".
  warn(
/home/yutanagano/Projects/tidytcells/src/tidytcells/_utils/warnings.py:7:
UserWarning: Failed to standardize "TCRVB6" for species homosapiens:
unrecognised gene name. Attempted fix: "TRVB6".
  warn(
/home/yutanagano/Projects/tidytcells/src/tidytcells/_utils/warnings.py:7:
UserWarning: Failed to standardize "TCRVB06" for species homosapiens:
unrecognised gene name. Attempted fix: "TRVB6".
  warn(
/home/yutanagano/Projects/tidytcells/src/tidytcells/_utils/warnings.py:7:
UserWarning: Failed to standardize "TCRVB12" for species homosapiens:
unrecognised gene name. Attempted fix: "TRVB12".
  warn(
/home/yutanagano/Projects/tidytcells/src/tidytcells/_utils/warnings.py:7:
UserWarning: Failed to standardize "TCRBV8-3" for species homosapiens:
unrecognised gene name. Attempted fix: "TRBV8-3".
  warn(
/home/yutanagano/Projects/tidytcells/src/tidytcells/_utils/warnings.py:7:
UserWarning: Failed to standardize "TCRBV8.3" for species homosapiens:

```

```

unrecognised gene name. Attempted fix: "TRBV8-3".
warn(
/home/yutanagano/Projects/tidytcells/src/tidytcells/_utils/warnings.py:7:
UserWarning: Failed to standardize "TCRBV31" for species homosapiens:
unrecognised gene name. Attempted fix: "TRBV31".
warn(
/home/yutanagano/Projects/tidytcells/src/tidytcells/_utils/warnings.py:7:
UserWarning: Failed to standardize "TCRVB8-2" for species homosapiens:
unrecognised gene name. Attempted fix: "TRVB8-2".
warn(
/home/yutanagano/Projects/tidytcells/src/tidytcells/_utils/warnings.py:7:
UserWarning: Failed to standardize "TCRBV3-3" for species homosapiens:
unrecognised gene name. Attempted fix: "TRBV3-3".
warn(
/home/yutanagano/Projects/tidytcells/src/tidytcells/_utils/warnings.py:7:
UserWarning: Failed to standardize "TCRBV12-3/4" for species homosapiens:
unrecognised gene name. Attempted fix: "TRBV12-3/4".
warn(
/home/yutanagano/Projects/tidytcells/src/tidytcells/_utils/warnings.py:7:
UserWarning: Failed to standardize "TCRBB27" for species homosapiens:
unrecognised gene name. Attempted fix: "TRBB27".
warn(
/home/yutanagano/Projects/tidytcells/src/tidytcells/_utils/warnings.py:7:
UserWarning: Failed to standardize "TRBV13-2*04" for species homosapiens:
unrecognised gene name. Attempted fix: "TRBV13-2*04".
warn(
/home/yutanagano/Projects/tidytcells/src/tidytcells/_utils/warnings.py:7:
UserWarning: Failed to standardize "2-1 (two-one)" for species musmusculus:
unrecognised gene name. Attempted fix: "TR2-1(TWO-ONE)".
warn(
/home/yutanagano/Projects/tidytcells/src/tidytcells/_utils/warnings.py:7:
UserWarning: Failed to standardize "TCRJ1-4*01" for species homosapiens:
unrecognised gene name. Attempted fix: "TRJ1-4*01".
warn(
/home/yutanagano/Projects/tidytcells/src/tidytcells/_utils/warnings.py:7:
UserWarning: Failed to standardize "TCRBJ2-2*02" for species homosapiens:
nonexistent allele for recognised gene. Attempted fix: "TRBJ2-2*02".
warn(
/home/yutanagano/Projects/tidytcells/src/tidytcells/_utils/warnings.py:7:
UserWarning: Failed to standardize "TCRBJ2*07" for species homosapiens:
nonexistent allele for recognised gene. Attempted fix: "TRBJ2-1*07".
warn(
/home/yutanagano/Projects/tidytcells/src/tidytcells/_utils/warnings.py:7:
UserWarning: Failed to standardize "TCRBJ1*03" for species homosapiens:
nonexistent allele for recognised gene. Attempted fix: "TRBJ1-1*03".
warn(
/home/yutanagano/Projects/tidytcells/src/tidytcells/_utils/warnings.py:7:
UserWarning: Failed to standardize "TCRBJ1*02" for species homosapiens:

```

```

nonexistent allele for recognised gene. Attempted fix: "TRBJ1-1*02".
    warn(
/home/yutanagano/Projects/tidytcells/src/tidytcells/_utils/warnings.py:7:
UserWarning: Failed to standardize "TCRBJ2*02" for species homosapiens:
nonexistent allele for recognised gene. Attempted fix: "TRBJ2-1*02".
    warn(
/home/yutanagano/Projects/tidytcells/src/tidytcells/_utils/warnings.py:7:
UserWarning: Failed to standardize "TCRBJ2*03" for species homosapiens:
nonexistent allele for recognised gene. Attempted fix: "TRBJ2-1*03".
    warn(
/home/yutanagano/Projects/tidytcells/src/tidytcells/_utils/warnings.py:7:
UserWarning: Failed to standardize "TCRBJ1*04" for species homosapiens:
nonexistent allele for recognised gene. Attempted fix: "TRBJ1-1*04".
    warn(
/home/yutanagano/Projects/tidytcells/src/tidytcells/_utils/warnings.py:7:
UserWarning: Failed to standardize "TCRBJ2*04" for species homosapiens:
nonexistent allele for recognised gene. Attempted fix: "TRBJ2-1*04".
    warn(
/home/yutanagano/Projects/tidytcells/src/tidytcells/_utils/warnings.py:7:
UserWarning: Failed to standardize "TCRBJ2*05" for species homosapiens:
nonexistent allele for recognised gene. Attempted fix: "TRBJ2-1*05".
    warn(
/home/yutanagano/Projects/tidytcells/src/tidytcells/_utils/warnings.py:7:
UserWarning: Failed to standardize "TRBJ1-4*02" for species homosapiens:
nonexistent allele for recognised gene. Attempted fix: "TRBJ1-4*02".
    warn(
/home/yutanagano/Projects/tidytcells/src/tidytcells/_utils/warnings.py:7:
UserWarning: Failed to standardize "TRBJ3-2" for species homosapiens:
unrecognised gene name. Attempted fix: "TRBJ3-2".
    warn(
/home/yutanagano/Projects/tidytcells/src/tidytcells/_utils/warnings.py:7:
UserWarning: Failed to standardize "TRAV14D-3/DV8*02" for species homosapiens:
unrecognised gene name. Attempted fix: "TRAV14D-3/DV8*02".
    warn(
/home/yutanagano/Projects/tidytcells/src/tidytcells/_utils/warnings.py:14:
UserWarning: Unsupported species: "syntheticconstruct". Skipping TR
standardisation.
    warn(f'Unsupported species: "{species}". ' f"Skipping {gene_type}
standardisation.")
/home/yutanagano/Projects/tidytcells/src/tidytcells/_utils/warnings.py:14:
UserWarning: Unsupported species: "macacamulatta". Skipping TR standardisation.
    warn(f'Unsupported species: "{species}". ' f"Skipping {gene_type}
standardisation.")
/home/yutanagano/Projects/tidytcells/src/tidytcells/_utils/warnings.py:14:
UserWarning: Unsupported species: "gallusgallus". Skipping TR standardisation.
    warn(f'Unsupported species: "{species}". ' f"Skipping {gene_type}
standardisation.")

```

```
[ ]: num_tr_successes = (
    tr_gene_symbols["corrected"].notna() & (
        tr_gene_symbols["species"].isna() |
        tr_gene_symbols["species"].map(lambda x: type(x) == str and x in
        ↪("homosapiens", "musmusculus"))
    )
).sum()
num_tr_total = len(tr_gene_symbols)

where_tr_changed = tr_gene_symbols[tr_gene_symbols["gene"] !=
    ↪tr_gene_symbols["corrected"]]
num_successful_tr_changes = where_tr_changed["corrected"].notna().sum()
num_tr_changes = len(where_tr_changed)

print(f"total number of IMGT-compliant TR symbols:      {num_tr_successes}")
print(f"original number of unique TR symbols:          {num_tr_total}")
print(f"fraction of TR symbols standardized:            {num_tr_successes /
    ↪num_tr_total}\n")

print(f"number of TR symbols originally IMGT-noncompliant: {num_tr_changes}")
print(f"number of IMGT-noncompliant symbols fixed:      ↪
    ↪{num_successful_tr_changes}")
print(f"fraction of IMGT-noncompliant symbols standardized:
    ↪{num_successful_tr_changes / num_tr_changes}")
```

```
total number of IMGT-compliant TR symbols:      2127
original number of unique TR symbols:          2225
fraction of TR symbols standardized:            0.9559550561797753
```

```
number of TR symbols originally IMGT-noncompliant: 1217
number of IMGT-noncompliant symbols fixed:        1137
fraction of IMGT-noncompliant symbols standardized: 0.934264585045193
```

```
[ ]: tr_gene_symbols.to_csv("tr_gene_symbols.csv", index=False)
```

### 1.3 Test MH standardization

```
[ ]: mh_gene_symbols["corrected"] = mh_gene_symbols.apply(
    lambda row: pd.NA
    if pd.isna(row["gene"])
    else tidytcells.mh.standardise(row["gene"], species="homosapiens" if
    ↪isna(row["species"]) else row["species"]),
    axis=1,
)
```

```
/home/yutanagano/Projects/tidytcells/src/tidytcells/_utils/warnings.py:7:
UserWarning: Failed to standardize "E63Q mutant" for species homosapiens:
unrecognised gene name. Attempted fix: "HLA-E63QMUTANT".
```

```

warn(
/home/yutanagano/Projects/tidytcells/src/tidytcells/_utils/warnings.py:7:
UserWarning: Failed to standardize "human CD1d" for species homosapiens:
unrecognised gene name. Attempted fix: "HLA-HUMANCD1D".
warn(
/home/yutanagano/Projects/tidytcells/src/tidytcells/_utils/warnings.py:7:
UserWarning: Failed to standardize "human MR1" for species homosapiens:
unrecognised gene name. Attempted fix: "HLA-HUMANMR*1".
warn(
/home/yutanagano/Projects/tidytcells/src/tidytcells/_utils/warnings.py:7:
UserWarning: Failed to standardize "H2-IAu" for species musmusculus:
unrecognised gene name. Attempted fix: "H2-IAU".
warn(
/home/yutanagano/Projects/tidytcells/src/tidytcells/_utils/warnings.py:7:
UserWarning: Failed to standardize "H2-IAb" for species musmusculus:
unrecognised gene name. Attempted fix: "H2-IAB".
warn(
/home/yutanagano/Projects/tidytcells/src/tidytcells/_utils/warnings.py:7:
UserWarning: Failed to standardize "H2-IAg7" for species musmusculus:
unrecognised gene name. Attempted fix: "H2-IAG7".
warn(
/home/yutanagano/Projects/tidytcells/src/tidytcells/_utils/warnings.py:7:
UserWarning: Failed to standardize "H2-Ld" for species musmusculus: unrecognised
gene name. Attempted fix: "H2-LD".
warn(
/home/yutanagano/Projects/tidytcells/src/tidytcells/_utils/warnings.py:7:
UserWarning: Failed to standardize "T69A" for species homosapiens: unrecognised
gene name. Attempted fix: "HLA-T69A".
warn(
/home/yutanagano/Projects/tidytcells/src/tidytcells/_utils/warnings.py:7:
UserWarning: Failed to standardize "Q155A mutant" for species homosapiens:
unrecognised gene name. Attempted fix: "HLA-Q155AMUTANT".
warn(
/home/yutanagano/Projects/tidytcells/src/tidytcells/_utils/warnings.py:7:
UserWarning: Failed to standardize "H2-Kb Y22F" for species musmusculus:
unrecognised gene name. Attempted fix: "H2-KBY22F".
warn(
/home/yutanagano/Projects/tidytcells/src/tidytcells/_utils/warnings.py:7:
UserWarning: Failed to standardize "M23I" for species musmusculus: unrecognised
gene name. Attempted fix: "M23I".
warn(
/home/yutanagano/Projects/tidytcells/src/tidytcells/_utils/warnings.py:7:
UserWarning: Failed to standardize "E24S" for species musmusculus: unrecognised
gene name. Attempted fix: "E24S".
warn(
/home/yutanagano/Projects/tidytcells/src/tidytcells/_utils/warnings.py:7:
UserWarning: Failed to standardize "D30N mutant" for species musmusculus:
unrecognised gene name. Attempted fix: "D30NMUTANT".

```

```

warn(
/home/yutanagano/Projects/tidytcells/src/tidytcells/_utils/warnings.py:7:
UserWarning: Failed to standardize "H2-Kb" for species musmusculus: unrecognised
gene name. Attempted fix: "H2-KB".
warn(
/home/yutanagano/Projects/tidytcells/src/tidytcells/_utils/warnings.py:7:
UserWarning: Failed to standardize "HLA-A*02:01" for species musmusculus:
unrecognised gene name. Attempted fix: "HLA-A*02".
warn(
/home/yutanagano/Projects/tidytcells/src/tidytcells/_utils/warnings.py:7:
UserWarning: Failed to standardize "HLA-A*02:01 W167A mutant" for species
musmusculus: unrecognised gene name. Attempted fix: "HLA-A*02".
warn(
/home/yutanagano/Projects/tidytcells/src/tidytcells/_utils/warnings.py:7:
UserWarning: Failed to standardize "HLA-A*02:01 T163A mutant" for species
musmusculus: unrecognised gene name. Attempted fix: "HLA-A*02".
warn(
/home/yutanagano/Projects/tidytcells/src/tidytcells/_utils/warnings.py:7:
UserWarning: Failed to standardize "HLA-A*02:01 K66A mutant" for species
musmusculus: unrecognised gene name. Attempted fix: "HLA-A*02".
warn(
/home/yutanagano/Projects/tidytcells/src/tidytcells/_utils/warnings.py:7:
UserWarning: Failed to standardize "HLA-A*02:01 Q155A mutant" for species
musmusculus: unrecognised gene name. Attempted fix: "HLA-A*02".
warn(
/home/yutanagano/Projects/tidytcells/src/tidytcells/_utils/warnings.py:7:
UserWarning: Failed to standardize "human CD1d" for species musmusculus:
unrecognised gene name. Attempted fix: "HUMANCD1D".
warn(
/home/yutanagano/Projects/tidytcells/src/tidytcells/_utils/warnings.py:7:
UserWarning: Failed to standardize "mouse CD1d" for species musmusculus:
unrecognised gene name. Attempted fix: "MOUSECD1D".
warn(
/home/yutanagano/Projects/tidytcells/src/tidytcells/_utils/warnings.py:7:
UserWarning: Failed to standardize "mouse CD1d" for species homosapiens:
unrecognised gene name. Attempted fix: "HLA-MOUSECD1D".
warn(
/home/yutanagano/Projects/tidytcells/src/tidytcells/_utils/warnings.py:7:
UserWarning: Failed to standardize "HLA-DQ1" for species homosapiens:
unrecognised gene name. Attempted fix: "HLA-DQ*1".
warn(
/home/yutanagano/Projects/tidytcells/src/tidytcells/_utils/warnings.py:7:
UserWarning: Failed to standardize "H2-IEk" for species musmusculus:
unrecognised gene name. Attempted fix: "H2-IEK".
warn(
/home/yutanagano/Projects/tidytcells/src/tidytcells/_utils/warnings.py:7:
UserWarning: Failed to standardize "HLA-DR" for species homosapiens:
unrecognised gene name. Attempted fix: "HLA-DR".

```

```

warn(
/home/yutanagano/Projects/tidytcells/src/tidytcells/_utils/warnings.py:7:
UserWarning: Failed to standardize "human CD1b" for species homosapiens:
unrecognised gene name. Attempted fix: "HLA-HUMANCD1B".
warn(
/home/yutanagano/Projects/tidytcells/src/tidytcells/_utils/warnings.py:7:
UserWarning: Failed to standardize "human MR1 K43A mutant" for species
homosapiens: unrecognised gene name. Attempted fix: "HLA-HUMANMR1K43AMUTANT".
warn(
/home/yutanagano/Projects/tidytcells/src/tidytcells/_utils/warnings.py:7:
UserWarning: Failed to standardize "cattle MR1" for species homosapiens:
unrecognised gene name. Attempted fix: "HLA-CATTLEMR*1".
warn(
/home/yutanagano/Projects/tidytcells/src/tidytcells/_utils/warnings.py:7:
UserWarning: Failed to standardize "human CD1a" for species homosapiens:
unrecognised gene name. Attempted fix: "HLA-HUMANCD1A".
warn(
/home/yutanagano/Projects/tidytcells/src/tidytcells/_utils/warnings.py:7:
UserWarning: Failed to standardize "mouse MR1" for species homosapiens:
unrecognised gene name. Attempted fix: "HLA-MOUSEMR*1".
warn(
/home/yutanagano/Projects/tidytcells/src/tidytcells/_utils/warnings.py:7:
UserWarning: Failed to standardize "human CD1c" for species homosapiens:
unrecognised gene name. Attempted fix: "HLA-HUMANCD1C".
warn(
/home/yutanagano/Projects/tidytcells/src/tidytcells/_utils/warnings.py:7:
UserWarning: Failed to standardize "HLA class II" for species homosapiens:
unrecognised gene name. Attempted fix: "HLA-HLACCLASSII".
warn(
/home/yutanagano/Projects/tidytcells/src/tidytcells/_utils/warnings.py:7:
UserWarning: Failed to standardize "H2-IAk" for species musmusculus:
unrecognised gene name. Attempted fix: "H2-IAK".
warn(
/home/yutanagano/Projects/tidytcells/src/tidytcells/_utils/warnings.py:7:
UserWarning: Failed to standardize "H2 class II" for species musmusculus:
unrecognised gene name. Attempted fix: "H2CLASSII".
warn(
/home/yutanagano/Projects/tidytcells/src/tidytcells/_utils/warnings.py:7:
UserWarning: Failed to standardize "H2-s class I" for species musmusculus:
unrecognised gene name. Attempted fix: "H2-SCLASSI".
warn(
/home/yutanagano/Projects/tidytcells/src/tidytcells/_utils/warnings.py:7:
UserWarning: Failed to standardize "H2-IAs" for species musmusculus:
unrecognised gene name. Attempted fix: "H2-IAS".
warn(
/home/yutanagano/Projects/tidytcells/src/tidytcells/_utils/warnings.py:7:
UserWarning: Failed to standardize "H2-b class I" for species musmusculus:
unrecognised gene name. Attempted fix: "H2-BCLASSI".

```



```

warn(
/home/yutanagano/Projects/tidytcells/src/tidytcells/_utils/warnings.py:7:
UserWarning: Failed to standardize "H2-b class II" for species musmusculus:
unrecognised gene name. Attempted fix: "H2-BCLASSII".
warn(
/home/yutanagano/Projects/tidytcells/src/tidytcells/_utils/warnings.py:7:
UserWarning: Failed to standardize "H2 class I" for species musmusculus:
unrecognised gene name. Attempted fix: "H2CLASSI".
warn(
/home/yutanagano/Projects/tidytcells/src/tidytcells/_utils/warnings.py:7:
UserWarning: Failed to standardize "H2-u class II" for species musmusculus:
unrecognised gene name. Attempted fix: "H2-UCLASSII".
warn(
/home/yutanagano/Projects/tidytcells/src/tidytcells/_utils/warnings.py:7:
UserWarning: Failed to standardize "H2-IAk" for species homosapiens:
unrecognised gene name. Attempted fix: "HLA-H2-IAK".
warn(
/home/yutanagano/Projects/tidytcells/src/tidytcells/_utils/warnings.py:7:
UserWarning: Failed to standardize "HLA-DR2" for species homosapiens:
unrecognised gene name. Attempted fix: "HLA-DR*2".
warn(
/home/yutanagano/Projects/tidytcells/src/tidytcells/_utils/warnings.py:7:
UserWarning: Failed to standardize "H2 class II" for species homosapiens:
unrecognised gene name. Attempted fix: "HLA-H2CLASSII".
warn(
/home/yutanagano/Projects/tidytcells/src/tidytcells/_utils/warnings.py:7:
UserWarning: Failed to standardize "H2-IAd" for species musmusculus:
unrecognised gene name. Attempted fix: "H2-IAD".
warn(
/home/yutanagano/Projects/tidytcells/src/tidytcells/_utils/warnings.py:7:
UserWarning: Failed to standardize "H2-d class II" for species musmusculus:
unrecognised gene name. Attempted fix: "H2-DCLASSII".
warn(
/home/yutanagano/Projects/tidytcells/src/tidytcells/_utils/warnings.py:7:
UserWarning: Failed to standardize "H2-IAq" for species musmusculus:
unrecognised gene name. Attempted fix: "H2-IAQ".
warn(
/home/yutanagano/Projects/tidytcells/src/tidytcells/_utils/warnings.py:7:
UserWarning: Failed to standardize "H2-Db Y159F mutant" for species musmusculus:
unrecognised gene name. Attempted fix: "H2-DBY159FMUTANT".
warn(
/home/yutanagano/Projects/tidytcells/src/tidytcells/_utils/warnings.py:7:
UserWarning: Failed to standardize "H2-Kd" for species musmusculus: unrecognised
gene name. Attempted fix: "H2-KD".
warn(
/home/yutanagano/Projects/tidytcells/src/tidytcells/_utils/warnings.py:7:
UserWarning: Failed to standardize "H2-a class II" for species musmusculus:
unrecognised gene name. Attempted fix: "H2-ACCLASSII".

```

```

warn(
/home/yutanagano/Projects/tidytcells/src/tidytcells/_utils/warnings.py:7:
UserWarning: Failed to standardize "Class II" for species musmusculus:
unrecognised gene name. Attempted fix: "CLASSII".
warn(
/home/yutanagano/Projects/tidytcells/src/tidytcells/_utils/warnings.py:7:
UserWarning: Failed to standardize "allele undetermined" for species
musmusculus: unrecognised gene name. Attempted fix: "ALLELEUNDETERMINED".
warn(
/home/yutanagano/Projects/tidytcells/src/tidytcells/_utils/warnings.py:7:
UserWarning: Failed to standardize "H2-IAb" for species homosapiens:
unrecognised gene name. Attempted fix: "HLA-H2-IAB".
warn(
/home/yutanagano/Projects/tidytcells/src/tidytcells/_utils/warnings.py:7:
UserWarning: Failed to standardize "H2-Kb D77S" for species musmusculus:
unrecognised gene name. Attempted fix: "H2-KBD77S".
warn(
/home/yutanagano/Projects/tidytcells/src/tidytcells/_utils/warnings.py:7:
UserWarning: Failed to standardize "K89A mutant" for species musmusculus:
unrecognised gene name. Attempted fix: "K89AMUTANT".
warn(
/home/yutanagano/Projects/tidytcells/src/tidytcells/_utils/warnings.py:7:
UserWarning: Failed to standardize "H2-Kb Y22F" for species homosapiens:
unrecognised gene name. Attempted fix: "HLA-H2-KBY22F".
warn(
/home/yutanagano/Projects/tidytcells/src/tidytcells/_utils/warnings.py:7:
UserWarning: Failed to standardize "M23I" for species homosapiens: unrecognised
gene name. Attempted fix: "HLA-M23I".
warn(
/home/yutanagano/Projects/tidytcells/src/tidytcells/_utils/warnings.py:7:
UserWarning: Failed to standardize "E24S" for species homosapiens: unrecognised
gene name. Attempted fix: "HLA-E24S".
warn(
/home/yutanagano/Projects/tidytcells/src/tidytcells/_utils/warnings.py:7:
UserWarning: Failed to standardize "D30N mutant" for species homosapiens:
unrecognised gene name. Attempted fix: "HLA-D30NMUTANT".
warn(
/home/yutanagano/Projects/tidytcells/src/tidytcells/_utils/warnings.py:7:
UserWarning: Failed to standardize "H2-Kb" for species homosapiens: unrecognised
gene name. Attempted fix: "HLA-H2-KB".
warn(
/home/yutanagano/Projects/tidytcells/src/tidytcells/_utils/warnings.py:7:
UserWarning: Failed to standardize "HLA-DR3" for species homosapiens:
unrecognised gene name. Attempted fix: "HLA-DR*3".
warn(
/home/yutanagano/Projects/tidytcells/src/tidytcells/_utils/warnings.py:7:
UserWarning: Failed to standardize "H2-d class II" for species homosapiens:
unrecognised gene name. Attempted fix: "HLA-H2-DCLASSII".

```

```

warn(
/home/yutanagano/Projects/tidytcells/src/tidytcells/_utils/warnings.py:7:
UserWarning: Failed to standardize "H2-IEd" for species homosapiens:
unrecognised gene name. Attempted fix: "HLA-H2-IED".
warn(
/home/yutanagano/Projects/tidytcells/src/tidytcells/_utils/warnings.py:7:
UserWarning: Failed to standardize "H2-Db" for species homosapiens: unrecognised
gene name. Attempted fix: "HLA-H2-DB".
warn(
/home/yutanagano/Projects/tidytcells/src/tidytcells/_utils/warnings.py:7:
UserWarning: Failed to standardize "H2-Kb Y84A mutant" for species homosapiens:
unrecognised gene name. Attempted fix: "HLA-H2-KBY84AMUTANT".
warn(
/home/yutanagano/Projects/tidytcells/src/tidytcells/_utils/warnings.py:7:
UserWarning: Failed to standardize "H2-Kb Y84C mutant" for species homosapiens:
unrecognised gene name. Attempted fix: "HLA-H2-KBY84CMUTANT".
warn(
/home/yutanagano/Projects/tidytcells/src/tidytcells/_utils/warnings.py:7:
UserWarning: Failed to standardize "H2 class I" for species homosapiens:
unrecognised gene name. Attempted fix: "HLA-H2CLASSI".
warn(
/home/yutanagano/Projects/tidytcells/src/tidytcells/_utils/warnings.py:7:
UserWarning: Failed to standardize "H2-b class I" for species homosapiens:
unrecognised gene name. Attempted fix: "HLA-H2-BCLASSI".
warn(
/home/yutanagano/Projects/tidytcells/src/tidytcells/_utils/warnings.py:7:
UserWarning: Failed to standardize "H2-b class II" for species homosapiens:
unrecognised gene name. Attempted fix: "HLA-H2-BCLASSII".
warn(
/home/yutanagano/Projects/tidytcells/src/tidytcells/_utils/warnings.py:7:
UserWarning: Failed to standardize "H2-IAg7" for species homosapiens:
unrecognised gene name. Attempted fix: "HLA-H2-IAg7".
warn(
/home/yutanagano/Projects/tidytcells/src/tidytcells/_utils/warnings.py:7:
UserWarning: Failed to standardize "HLA class I" for species homosapiens:
unrecognised gene name. Attempted fix: "HLA-HLAClassI".
warn(
/home/yutanagano/Projects/tidytcells/src/tidytcells/_utils/warnings.py:7:
UserWarning: Failed to standardize "H2-IAs" for species homosapiens:
unrecognised gene name. Attempted fix: "HLA-H2-IAS".
warn(
/home/yutanagano/Projects/tidytcells/src/tidytcells/_utils/warnings.py:7:
UserWarning: Failed to standardize "H2-IEk" for species homosapiens:
unrecognised gene name. Attempted fix: "HLA-H2-IEK".
warn(
/home/yutanagano/Projects/tidytcells/src/tidytcells/_utils/warnings.py:14:
UserWarning: Unsupported species: "syntheticconstruct". Skipping MH
standardisation.

```

```

    warn(f'Unsupported species: "{species}". ' f"Skipping {gene_type}
standardisation.")
/home/yutanagano/Projects/tidytcells/src/tidytcells/_utils/warnings.py:7:
UserWarning: Failed to standardize "H2-Kd" for species homosapiens: unrecognised
gene name. Attempted fix: "HLA-H2-KD".
    warn(
/home/yutanagano/Projects/tidytcells/src/tidytcells/_utils/warnings.py:14:
UserWarning: Unsupported species: "unculturedmarineeubacteriumhstpl64". Skipping
MH standardisation.
    warn(f'Unsupported species: "{species}". ' f"Skipping {gene_type}
standardisation.")
/home/yutanagano/Projects/tidytcells/src/tidytcells/_utils/warnings.py:7:
UserWarning: Failed to standardize "HLA-DR1" for species homosapiens:
unrecognised gene name. Attempted fix: "HLA-DR*1".
    warn(
/home/yutanagano/Projects/tidytcells/src/tidytcells/_utils/warnings.py:7:
UserWarning: Failed to standardize "HLA-DQ2" for species homosapiens:
unrecognised gene name. Attempted fix: "HLA-DQ*2".
    warn(
/home/yutanagano/Projects/tidytcells/src/tidytcells/_utils/warnings.py:7:
UserWarning: Failed to standardize "HLA-DP" for species homosapiens:
unrecognised gene name. Attempted fix: "HLA-DP".
    warn(
/home/yutanagano/Projects/tidytcells/src/tidytcells/_utils/warnings.py:7:
UserWarning: Failed to standardize "HLA-DQ" for species homosapiens:
unrecognised gene name. Attempted fix: "HLA-DQ".
    warn(
/home/yutanagano/Projects/tidytcells/src/tidytcells/_utils/warnings.py:7:
UserWarning: Failed to standardize "mouse MR1" for species musmusculus:
unrecognised gene name. Attempted fix: "MOUSEMR1".
    warn(
/home/yutanagano/Projects/tidytcells/src/tidytcells/_utils/warnings.py:7:
UserWarning: Failed to standardize "H2-IAd" for species homosapiens:
unrecognised gene name. Attempted fix: "HLA-H2-IAD".
    warn(
/home/yutanagano/Projects/tidytcells/src/tidytcells/_utils/warnings.py:14:
UserWarning: Unsupported species: "macacamulatta". Skipping MH standardisation.
    warn(f'Unsupported species: "{species}". ' f"Skipping {gene_type}
standardisation.")
/home/yutanagano/Projects/tidytcells/src/tidytcells/_utils/warnings.py:7:
UserWarning: Failed to standardize "H2-IAb I67F" for species musmusculus:
unrecognised gene name. Attempted fix: "H2-IABI67F".
    warn(
/home/yutanagano/Projects/tidytcells/src/tidytcells/_utils/warnings.py:7:
UserWarning: Failed to standardize "R70Q" for species musmusculus: unrecognised
gene name. Attempted fix: "R70Q".
    warn(
/home/yutanagano/Projects/tidytcells/src/tidytcells/_utils/warnings.py:7:

```

```

UserWarning: Failed to standardize "T71K mutant" for species musmusculus:
unrecognised gene name. Attempted fix: "T71KMUTANT".
    warn(
/home/yutanagano/Projects/tidytcells/src/tidytcells/_utils/warnings.py:7:
UserWarning: Failed to standardize "HLA-DR4" for species homosapiens:
unrecognised gene name. Attempted fix: "HLA-DR*4".
    warn(
/home/yutanagano/Projects/tidytcells/src/tidytcells/_utils/warnings.py:7:
UserWarning: Failed to standardize "HLA-A*11:01" for species musmusculus:
unrecognised gene name. Attempted fix: "HLA-A*11".
    warn(
/home/yutanagano/Projects/tidytcells/src/tidytcells/_utils/warnings.py:14:
UserWarning: Unsupported species: "gallusgallus". Skipping MH standardisation.
    warn(f'Unsupported species: "{species}". ' f"Skipping {gene_type}
standardisation.")
/home/yutanagano/Projects/tidytcells/src/tidytcells/_utils/warnings.py:7:
UserWarning: Failed to standardize "HLA-DQ6" for species homosapiens:
unrecognised gene name. Attempted fix: "HLA-DQ*6".
    warn(
/home/yutanagano/Projects/tidytcells/src/tidytcells/_utils/warnings.py:7:
UserWarning: Failed to standardize "HLA-DR7" for species homosapiens:
unrecognised gene name. Attempted fix: "HLA-DR*7".
    warn(
/home/yutanagano/Projects/tidytcells/src/tidytcells/_utils/warnings.py:7:
UserWarning: Failed to standardize "HLA-DRB1*04:01" for species musmusculus:
unrecognised gene name. Attempted fix: "HLA-DRB1*04".
    warn(
/home/yutanagano/Projects/tidytcells/src/tidytcells/_utils/warnings.py:7:
UserWarning: Failed to standardize "HLA-DRB1*04:05" for species musmusculus:
unrecognised gene name. Attempted fix: "HLA-DRB1*04".
    warn(
/home/yutanagano/Projects/tidytcells/src/tidytcells/_utils/warnings.py:7:
UserWarning: Failed to standardize "mouse CD1d1" for species musmusculus:
unrecognised gene name. Attempted fix: "MOUSECD1D1".
    warn(
/home/yutanagano/Projects/tidytcells/src/tidytcells/_utils/warnings.py:7:
UserWarning: Failed to standardize "HLA-DPW2" for species homosapiens:
unrecognised gene name. Attempted fix: "HLA-DPW*2".
    warn(
/home/yutanagano/Projects/tidytcells/src/tidytcells/_utils/warnings.py:7:
UserWarning: Failed to standardize "HLA-DRB1*01:01" for species musmusculus:
unrecognised gene name. Attempted fix: "HLA-DRB1*01".
    warn(
/home/yutanagano/Projects/tidytcells/src/tidytcells/_utils/warnings.py:7:
UserWarning: Failed to standardize "HLA-DR11" for species homosapiens:
unrecognised gene name. Attempted fix: "HLA-DR*11".
    warn(

```

```
[ ]: num_mh_successes = (
    mh_gene_symbols["corrected"].notna() & (
        mh_gene_symbols["species"].isna() |
        mh_gene_symbols["species"].map(lambda x: type(x) == str and x in
        ↪("homo sapiens", "mus musculus"))
    )
).sum()
num_mh_total = len(mh_gene_symbols)

where_mh_changed = mh_gene_symbols[mh_gene_symbols["gene"] !=
    ↪mh_gene_symbols["corrected"]]
num_successful_mh_changes = where_mh_changed["corrected"].notna().sum()
num_mh_changes = len(where_mh_changed)

print(f"total number of IMGT-compliant MH symbols:      {num_mh_successes}")
print(f"original number of unique MH symbols:          {num_mh_total}")
print(f"fraction of MH symbols standardized:           {num_mh_successes /
    ↪num_mh_total}\n")

print(f"number of MH symbols originally IMGT-noncompliant: {num_mh_changes}")
print(f"number of IMGT-noncompliant symbols fixed:      ↪
    ↪{num_successful_mh_changes}")
print(f"fraction of IMGT-noncompliant symbols standardized:
    ↪{num_successful_mh_changes / num_mh_changes}")
```

```
total number of IMGT-compliant MH symbols:      173
original number of unique MH symbols:          284
fraction of MH symbols standardized:           0.6091549295774648
```

```
number of MH symbols originally IMGT-noncompliant: 151
number of IMGT-noncompliant symbols fixed:      45
fraction of IMGT-noncompliant symbols standardized: 0.2980132450331126
```

```
[ ]: mh_gene_symbols.to_csv("mh_gene_symbols.csv", index=False)
```

## 1.4 Test junction standardization

```
[ ]: junctions["corrected"] = junctions["junction"].map(tidytcells.junction.
    ↪standardize)
```

```
/home/yutanagano/Projects/tidytcells/src/tidytcells/aa/_standardize.py:80:
UserWarning: Failed to standardize IVRVSHN*G#RDNYGQNFV: not a valid amino acid
sequence.
    warnings.warn(
/home/yutanagano/Projects/tidytcells/src/tidytcells/aa/_standardize.py:80:
UserWarning: Failed to standardize AFTSGTYXYI: not a valid amino acid sequence.
    warnings.warn(
/home/yutanagano/Projects/tidytcells/src/tidytcells/aa/_standardize.py:80:
```

```

UserWarning: Failed to standardize AG4DSQSARQLT: not a valid amino acid
sequence.
    warnings.warn(
/home/yutanagano/Projects/tidytcells/src/tidytcells/aa/_standardize.py:80:
UserWarning: Failed to standardize AGAGSOGNLI: not a valid amino acid sequence.
    warnings.warn(
/home/yutanagano/Projects/tidytcells/src/tidytcells/aa/_standardize.py:80:
UserWarning: Failed to standardize AGAOGSOGNLIF: not a valid amino acid
sequence.
    warnings.warn(
/home/yutanagano/Projects/tidytcells/src/tidytcells/aa/_standardize.py:80:
UserWarning: Failed to standardize AGAVGSSNTGKU: not a valid amino acid
sequence.
    warnings.warn(
/home/yutanagano/Projects/tidytcells/src/tidytcells/aa/_standardize.py:80:
UserWarning: Failed to standardize AGGGSOGNLI: not a valid amino acid sequence.
    warnings.warn(
/home/yutanagano/Projects/tidytcells/src/tidytcells/aa/_standardize.py:80:
UserWarning: Failed to standardize AGGGSQGNRJ: not a valid amino acid sequence.
    warnings.warn(
/home/yutanagano/Projects/tidytcells/src/tidytcells/aa/_standardize.py:80:
UserWarning: Failed to standardize AGRGSOGNLI: not a valid amino acid sequence.
    warnings.warn(
/home/yutanagano/Projects/tidytcells/src/tidytcells/aa/_standardize.py:80:
UserWarning: Failed to standardize AGROVEYGNKLV: not a valid amino acid
sequence.
    warnings.warn(
/home/yutanagano/Projects/tidytcells/src/tidytcells/aa/_standardize.py:80:
UserWarning: Failed to standardize AIIEAROOXII: not a valid amino acid sequence.
    warnings.warn(
/home/yutanagano/Projects/tidytcells/src/tidytcells/aa/_standardize.py:80:
UserWarning: Failed to standardize AMNQAGTAU: not a valid amino acid sequence.
    warnings.warn(
/home/yutanagano/Projects/tidytcells/src/tidytcells/aa/_standardize.py:80:
UserWarning: Failed to standardize AMSGOGGSQGNLI: not a valid amino acid
sequence.
    warnings.warn(
/home/yutanagano/Projects/tidytcells/src/tidytcells/aa/_standardize.py:80:
UserWarning: Failed to standardize APRQGSAROLT: not a valid amino acid sequence.
    warnings.warn(
/home/yutanagano/Projects/tidytcells/src/tidytcells/aa/_standardize.py:80:
UserWarning: Failed to standardize ARSGDGGSQINIJ: not a valid amino acid
sequence.
    warnings.warn(
/home/yutanagano/Projects/tidytcells/src/tidytcells/aa/_standardize.py:80:
UserWarning: Failed to standardize AVEGPGSGAGSYQIJ: not a valid amino acid
sequence.
    warnings.warn(

```

```

/home/yutanagano/Projects/tidytcells/src/tidytcells/aa/_standardize.py:80:
UserWarning: Failed to standardize AVGOSFQKLV: not a valid amino acid sequence.
    warnings.warn(
/home/yutanagano/Projects/tidytcells/src/tidytcells/aa/_standardize.py:80:
UserWarning: Failed to standardize AVNRSNFGNEXUF: not a valid amino acid
sequence.
    warnings.warn(
/home/yutanagano/Projects/tidytcells/src/tidytcells/aa/_standardize.py:80:
UserWarning: Failed to standardize AVNSVNRDDKUF: not a valid amino acid
sequence.
    warnings.warn(
/home/yutanagano/Projects/tidytcells/src/tidytcells/aa/_standardize.py:80:
UserWarning: Failed to standardize AVRDKII: not a valid amino acid sequence.
    warnings.warn(
/home/yutanagano/Projects/tidytcells/src/tidytcells/aa/_standardize.py:80:
UserWarning: Failed to standardize AVSGGGGSQGNUF: not a valid amino acid
sequence.
    warnings.warn(
/home/yutanagano/Projects/tidytcells/src/tidytcells/aa/_standardize.py:80:
UserWarning: Failed to standardize AVSRVWTA(I: not a valid amino acid sequence.
    warnings.warn(
/home/yutanagano/Projects/tidytcells/src/tidytcells/aa/_standardize.py:80:
UserWarning: Failed to standardize AVSSKNOMR: not a valid amino acid sequence.
    warnings.warn(
/home/yutanagano/Projects/tidytcells/src/tidytcells/aa/_standardize.py:80:
UserWarning: Failed to standardize AVSTGGGJMQJ: not a valid amino acid sequence.
    warnings.warn(
/home/yutanagano/Projects/tidytcells/src/tidytcells/aa/_standardize.py:80:
UserWarning: Failed to standardize AVTKEIGNEXLT: not a valid amino acid
sequence.
    warnings.warn(
/home/yutanagano/Projects/tidytcells/src/tidytcells/aa/_standardize.py:80:
UserWarning: Failed to standardize AVXGNEKLT: not a valid amino acid sequence.
    warnings.warn(
/home/yutanagano/Projects/tidytcells/src/tidytcells/aa/_standardize.py:80:
UserWarning: Failed to standardize AVXKGSGGYQKVT: not a valid amino acid
sequence.
    warnings.warn(
/home/yutanagano/Projects/tidytcells/src/tidytcells/aa/_standardize.py:80:
UserWarning: Failed to standardize VDNQGGXLI: not a valid amino acid sequence.
    warnings.warn(
/home/yutanagano/Projects/tidytcells/src/tidytcells/aa/_standardize.py:80:
UserWarning: Failed to standardize VGOSSGTYKYI: not a valid amino acid sequence.
    warnings.warn(
/home/yutanagano/Projects/tidytcells/src/tidytcells/aa/_standardize.py:80:
UserWarning: Failed to standardize VSGAGSYQ1T: not a valid amino acid sequence.
    warnings.warn(
/home/yutanagano/Projects/tidytcells/src/tidytcells/aa/_standardize.py:80:

```



```

UserWarning: Failed to standardize VVNGONNDMR: not a valid amino acid sequence.
    warnings.warn(
/home/yutanagano/Projects/tidytcells/src/tidytcells/aa/_standardize.py:80:
UserWarning: Failed to standardize VVNIPNDYXLS: not a valid amino acid sequence.
    warnings.warn(
/home/yutanagano/Projects/tidytcells/src/tidytcells/aa/_standardize.py:80:
UserWarning: Failed to standardize VVSQGYSTIJ: not a valid amino acid sequence.
    warnings.warn(
/home/yutanagano/Projects/tidytcells/src/tidytcells/aa/_standardize.py:80:
UserWarning: Failed to standardize CAMRVSGGSNAKLTFG : not a valid amino acid
sequence.
    warnings.warn(
/home/yutanagano/Projects/tidytcells/src/tidytcells/aa/_standardize.py:80:
UserWarning: Failed to standardize CAXRGGSEKLVF: not a valid amino acid
sequence.
    warnings.warn(
/home/yutanagano/Projects/tidytcells/src/tidytcells/aa/_standardize.py:80:
UserWarning: Failed to standardize CAVERGL##GSQGNLIF: not a valid amino acid
sequence.
    warnings.warn(
/home/yutanagano/Projects/tidytcells/src/tidytcells/aa/_standardize.py:80:
UserWarning: Failed to standardize CAVEDRGEKHXSCL: not a valid amino acid
sequence.
    warnings.warn(
/home/yutanagano/Projects/tidytcells/src/tidytcells/aa/_standardize.py:80:
UserWarning: Failed to standardize CAASSWS*#GLTF: not a valid amino acid
sequence.
    warnings.warn(
/home/yutanagano/Projects/tidytcells/src/tidytcells/aa/_standardize.py:80:
UserWarning: Failed to standardize VQQAQ#YGGSQGNLIF: not a valid amino acid
sequence.
    warnings.warn(
/home/yutanagano/Projects/tidytcells/src/tidytcells/aa/_standardize.py:80:
UserWarning: Failed to standardize CAIELQAR##: not a valid amino acid sequence.
    warnings.warn(
/home/yutanagano/Projects/tidytcells/src/tidytcells/aa/_standardize.py:80:
UserWarning: Failed to standardize CTPG#SQGNLIF: not a valid amino acid
sequence.
    warnings.warn(
/home/yutanagano/Projects/tidytcells/src/tidytcells/aa/_standardize.py:80:
UserWarning: Failed to standardize CI##GGADGLTF: not a valid amino acid
sequence.
    warnings.warn(
/home/yutanagano/Projects/tidytcells/src/tidytcells/aa/_standardize.py:80:
UserWarning: Failed to standardize CAEKARSMVXNYQLIW: not a valid amino acid
sequence.
    warnings.warn(
/home/yutanagano/Projects/tidytcells/src/tidytcells/aa/_standardize.py:80:

```

```

UserWarning: Failed to standardize CAVSGGNYGVXQGNLIF: not a valid amino acid
sequence.
    warnings.warn(
/home/yutanagano/Projects/tidytcells/src/tidytcells/aa/_standardize.py:80:
UserWarning: Failed to standardize CCEGLM#AGTALIF: not a valid amino acid
sequence.
    warnings.warn(
/home/yutanagano/Projects/tidytcells/src/tidytcells/aa/_standardize.py:80:
UserWarning: Failed to standardize CI#GGGADGLTF: not a valid amino acid
sequence.
    warnings.warn(
/home/yutanagano/Projects/tidytcells/src/tidytcells/aa/_standardize.py:80:
UserWarning: Failed to standardize CIVRVLGIVEVATIN#TF: not a valid amino acid
sequence.
    warnings.warn(
/home/yutanagano/Projects/tidytcells/src/tidytcells/aa/_standardize.py:80:
UserWarning: Failed to standardize VQQYSS#QAGTALIF: not a valid amino acid
sequence.
    warnings.warn(
/home/yutanagano/Projects/tidytcells/src/tidytcells/aa/_standardize.py:80:
UserWarning: Failed to standardize XEXXGGXXRXXX##: not a valid amino acid
sequence.
    warnings.warn(
/home/yutanagano/Projects/tidytcells/src/tidytcells/aa/_standardize.py:80:
UserWarning: Failed to standardize CIVSVLG#SGGSNYKLTF: not a valid amino acid
sequence.
    warnings.warn(
/home/yutanagano/Projects/tidytcells/src/tidytcells/aa/_standardize.py:80:
UserWarning: Failed to standardize CTSVQQAL#GGSQGNLIF: not a valid amino acid
sequence.
    warnings.warn(
/home/yutanagano/Projects/tidytcells/src/tidytcells/aa/_standardize.py:80:
UserWarning: Failed to standardize CIVRQLGTGAVVTIN*#F: not a valid amino acid
sequence.
    warnings.warn(
/home/yutanagano/Projects/tidytcells/src/tidytcells/aa/_standardize.py:80:
UserWarning: Failed to standardize CAVED#ISSGSARQLTF: not a valid amino acid
sequence.
    warnings.warn(
/home/yutanagano/Projects/tidytcells/src/tidytcells/aa/_standardize.py:80:
UserWarning: Failed to standardize VL*#GGGADGLTF: not a valid amino acid
sequence.
    warnings.warn(
/home/yutanagano/Projects/tidytcells/src/tidytcells/aa/_standardize.py:80:
UserWarning: Failed to standardize VQQDLGY##GGTSYGKLTF: not a valid amino acid
sequence.
    warnings.warn(
/home/yutanagano/Projects/tidytcells/src/tidytcells/aa/_standardize.py:80:

```

```

UserWarning: Failed to standardize VL*VLPG#ALNF: not a valid amino acid
sequence.
    warnings.warn(
/home/yutanagano/Projects/tidytcells/src/tidytcells/aa/_standardize.py:80:
UserWarning: Failed to standardize CAVND#NTDKLIF: not a valid amino acid
sequence.
    warnings.warn(
/home/yutanagano/Projects/tidytcells/src/tidytcells/aa/_standardize.py:80:
UserWarning: Failed to standardize CAGLGGT#GGSNYKLTF: not a valid amino acid
sequence.
    warnings.warn(
/home/yutanagano/Projects/tidytcells/src/tidytcells/aa/_standardize.py:80:
UserWarning: Failed to standardize CAPQTRRLATTVS*#W: not a valid amino acid
sequence.
    warnings.warn(
/home/yutanagano/Projects/tidytcells/src/tidytcells/aa/_standardize.py:80:
UserWarning: Failed to standardize CAVSGPS#TDSWGKLQF: not a valid amino acid
sequence.
    warnings.warn(
/home/yutanagano/Projects/tidytcells/src/tidytcells/aa/_standardize.py:80:
UserWarning: Failed to standardize CAVSAAX#AGNKLTF: not a valid amino acid
sequence.
    warnings.warn(
/home/yutanagano/Projects/tidytcells/src/tidytcells/aa/_standardize.py:80:
UserWarning: Failed to standardize CAVSA#KAAGNKLTF: not a valid amino acid
sequence.
    warnings.warn(
/home/yutanagano/Projects/tidytcells/src/tidytcells/aa/_standardize.py:80:
UserWarning: Failed to standardize CIVRV#NSNSGYALNF: not a valid amino acid
sequence.
    warnings.warn(
/home/yutanagano/Projects/tidytcells/src/tidytcells/aa/_standardize.py:80:
UserWarning: Failed to standardize CATLCPQ#NKLTF: not a valid amino acid
sequence.
    warnings.warn(
/home/yutanagano/Projects/tidytcells/src/tidytcells/aa/_standardize.py:80:
UserWarning: Failed to standardize VQQAG#SNYKLTF: not a valid amino acid
sequence.
    warnings.warn(
/home/yutanagano/Projects/tidytcells/src/tidytcells/aa/_standardize.py:80:
UserWarning: Failed to standardize CISP*SGSSNTGKLIF: not a valid amino acid
sequence.
    warnings.warn(
/home/yutanagano/Projects/tidytcells/src/tidytcells/aa/_standardize.py:80:
UserWarning: Failed to standardize CIXXL*NDIGENMFLI: not a valid amino acid
sequence.
    warnings.warn(
/home/yutanagano/Projects/tidytcells/src/tidytcells/aa/_standardize.py:80:

```

```

UserWarning: Failed to standardize CIVRVA#SGNTPLVF: not a valid amino acid
sequence.
    warnings.warn(
/home/yutanagano/Projects/tidytcells/src/tidytcells/aa/_standardize.py:80:
UserWarning: Failed to standardize CAG#YGNKLVF: not a valid amino acid sequence.
    warnings.warn(
/home/yutanagano/Projects/tidytcells/src/tidytcells/aa/_standardize.py:80:
UserWarning: Failed to standardize CAXSGGGSYQLTF: not a valid amino acid
sequence.
    warnings.warn(
/home/yutanagano/Projects/tidytcells/src/tidytcells/aa/_standardize.py:80:
UserWarning: Failed to standardize CALPP#YNFNKFYF: not a valid amino acid
sequence.
    warnings.warn(
/home/yutanagano/Projects/tidytcells/src/tidytcells/aa/_standardize.py:80:
UserWarning: Failed to standardize CAVS#SNFGNEKLTF: not a valid amino acid
sequence.
    warnings.warn(
/home/yutanagano/Projects/tidytcells/src/tidytcells/aa/_standardize.py:80:
UserWarning: Failed to standardize VL*#DSSYKLIF: not a valid amino acid
sequence.
    warnings.warn(
/home/yutanagano/Projects/tidytcells/src/tidytcells/aa/_standardize.py:80:
UserWarning: Failed to standardize CAD$#ARQLTF: not a valid amino acid sequence.
    warnings.warn(
/home/yutanagano/Projects/tidytcells/src/tidytcells/aa/_standardize.py:80:
UserWarning: Failed to standardize CAASGXGTYKYIF: not a valid amino acid
sequence.
    warnings.warn(
/home/yutanagano/Projects/tidytcells/src/tidytcells/aa/_standardize.py:80:
UserWarning: Failed to standardize VILGV#QKVTF: not a valid amino acid sequence.
    warnings.warn(
/home/yutanagano/Projects/tidytcells/src/tidytcells/aa/_standardize.py:80:
UserWarning: Failed to standardize CVVSAAG#GGGADGLTF: not a valid amino acid
sequence.
    warnings.warn(
/home/yutanagano/Projects/tidytcells/src/tidytcells/aa/_standardize.py:80:
UserWarning: Failed to standardize CVVNGMDSSYKLXF: not a valid amino acid
sequence.
    warnings.warn(
/home/yutanagano/Projects/tidytcells/src/tidytcells/aa/_standardize.py:80:
UserWarning: Failed to standardize CAVDTGNQFYF : not a valid amino acid
sequence.
    warnings.warn(
/home/yutanagano/Projects/tidytcells/src/tidytcells/aa/_standardize.py:80:
UserWarning: Failed to standardize CILXTDSWGKLQF: not a valid amino acid
sequence.
    warnings.warn(

```

```

/home/yutanagano/Projects/tidytcells/src/tidytcells/aa/_standardize.py:80:
UserWarning: Failed to standardize CAVSPXYALNFG: not a valid amino acid
sequence.
    warnings.warn(
/home/yutanagano/Projects/tidytcells/src/tidytcells/aa/_standardize.py:80:
UserWarning: Failed to standardize RARVSATSTDTQ#: not a valid amino acid
sequence.
    warnings.warn(
/home/yutanagano/Projects/tidytcells/src/tidytcells/aa/_standardize.py:80:
UserWarning: Failed to standardize RARDLRELXEY: not a valid amino acid
sequence.
    warnings.warn(
/home/yutanagano/Projects/tidytcells/src/tidytcells/aa/_standardize.py:80:
UserWarning: Failed to standardize ASXKRD*RGGLQ*A#F: not a valid amino acid
sequence.
    warnings.warn(
/home/yutanagano/Projects/tidytcells/src/tidytcells/aa/_standardize.py:80:
UserWarning: Failed to standardize SAQXTPRPVSS#: not a valid amino acid
sequence.
    warnings.warn(
/home/yutanagano/Projects/tidytcells/src/tidytcells/aa/_standardize.py:80:
UserWarning: Failed to standardize RANGAR#EQY: not a valid amino acid sequence.
    warnings.warn(
/home/yutanagano/Projects/tidytcells/src/tidytcells/aa/_standardize.py:80:
UserWarning: Failed to standardize RXGDRGTDQ#: not a valid amino acid sequence.
    warnings.warn(
/home/yutanagano/Projects/tidytcells/src/tidytcells/aa/_standardize.py:80:
UserWarning: Failed to standardize ASSLAGRPQIR##: not a valid amino acid
sequence.
    warnings.warn(
/home/yutanagano/Projects/tidytcells/src/tidytcells/aa/_standardize.py:80:
UserWarning: Failed to standardize ASXEGQGLGGWVNXL: not a valid amino acid
sequence.
    warnings.warn(
/home/yutanagano/Projects/tidytcells/src/tidytcells/aa/_standardize.py:80:
UserWarning: Failed to standardize AXXEGRGWALGPTAX#: not a valid amino acid
sequence.
    warnings.warn(
/home/yutanagano/Projects/tidytcells/src/tidytcells/aa/_standardize.py:80:
UserWarning: Failed to standardize ASSGXGGQPQH: not a valid amino acid sequence.
    warnings.warn(
/home/yutanagano/Projects/tidytcells/src/tidytcells/aa/_standardize.py:80:
UserWarning: Failed to standardize AS*GQGQETQN: not a valid amino acid sequence.
    warnings.warn(
/home/yutanagano/Projects/tidytcells/src/tidytcells/aa/_standardize.py:80:
UserWarning: Failed to standardize ARQGD*RKXDTQ#: not a valid amino acid
sequence.
    warnings.warn(

```

```

/home/yutanagano/Projects/tidytcells/src/tidytcells/aa/_standardize.py:80:
UserWarning: Failed to standardize ASSERGGSEY: not a valid amino acid
sequence.
    warnings.warn(
/home/yutanagano/Projects/tidytcells/src/tidytcells/aa/_standardize.py:80:
UserWarning: Failed to standardize RAKLGLTDTQ#: not a valid amino acid
sequence.
    warnings.warn(
/home/yutanagano/Projects/tidytcells/src/tidytcells/aa/_standardize.py:80:
UserWarning: Failed to standardize VPAIIRGGGXEEY: not a valid amino acid
sequence.
    warnings.warn(
/home/yutanagano/Projects/tidytcells/src/tidytcells/aa/_standardize.py:80:
UserWarning: Failed to standardize ASSLAGQTPDTQ#: not a valid amino acid
sequence.
    warnings.warn(
/home/yutanagano/Projects/tidytcells/src/tidytcells/aa/_standardize.py:80:
UserWarning: Failed to standardize VPSVPRQE#QPQHF: not a valid amino acid
sequence.
    warnings.warn(
/home/yutanagano/Projects/tidytcells/src/tidytcells/aa/_standardize.py:80:
UserWarning: Failed to standardize ARSWEDTQX: not a valid amino acid sequence.
    warnings.warn(
/home/yutanagano/Projects/tidytcells/src/tidytcells/aa/_standardize.py:80:
UserWarning: Failed to standardize SAPSGPP#NYGYT: not a valid amino acid
sequence.
    warnings.warn(
/home/yutanagano/Projects/tidytcells/src/tidytcells/aa/_standardize.py:80:
UserWarning: Failed to standardize CATDVINDY*LSF: not a valid amino acid
sequence.
    warnings.warn(
/home/yutanagano/Projects/tidytcells/src/tidytcells/aa/_standardize.py:80:
UserWarning: Failed to standardize CAAY#SGTYKYIF: not a valid amino acid
sequence.
    warnings.warn(
/home/yutanagano/Projects/tidytcells/src/tidytcells/aa/_standardize.py:80:
UserWarning: Failed to standardize VL*V#AGGTSYGKLTf: not a valid amino acid
sequence.
    warnings.warn(
/home/yutanagano/Projects/tidytcells/src/tidytcells/aa/_standardize.py:80:
UserWarning: Failed to standardize CATLC#AGNKLTF: not a valid amino acid
sequence.
    warnings.warn(
/home/yutanagano/Projects/tidytcells/src/tidytcells/aa/_standardize.py:80:
UserWarning: Failed to standardize CAVTRW#GGYQKVTF: not a valid amino acid
sequence.
    warnings.warn(
/home/yutanagano/Projects/tidytcells/src/tidytcells/aa/_standardize.py:80:

```

```

UserWarning: Failed to standardize ILPXSWGKL: not a valid amino acid sequence.
    warnings.warn(
/home/yutanagano/Projects/tidytcells/src/tidytcells/aa/_standardize.py:80:
UserWarning: Failed to standardize CVVNNNXDMRF: not a valid amino acid sequence.
    warnings.warn(
/home/yutanagano/Projects/tidytcells/src/tidytcells/aa/_standardize.py:80:
UserWarning: Failed to standardize XVXNREDKLVF: not a valid amino acid sequence.
    warnings.warn(
/home/yutanagano/Projects/tidytcells/src/tidytcells/aa/_standardize.py:80:
UserWarning: Failed to standardize AWKFRDSTYEOY: not a valid amino acid
sequence.
    warnings.warn(
/home/yutanagano/Projects/tidytcells/src/tidytcells/aa/_standardize.py:80:
UserWarning: Failed to standardize ASSITWSGGGAOGIETQY: not a valid amino acid
sequence.
    warnings.warn(
/home/yutanagano/Projects/tidytcells/src/tidytcells/aa/_standardize.py:80:
UserWarning: Failed to standardize ASSLGOQDLVYANTGELF: not a valid amino acid
sequence.
    warnings.warn(
/home/yutanagano/Projects/tidytcells/src/tidytcells/aa/_standardize.py:80:
UserWarning: Failed to standardize ASSLOQGGQETQY: not a valid amino acid
sequence.
    warnings.warn(
/home/yutanagano/Projects/tidytcells/src/tidytcells/aa/_standardize.py:80:
UserWarning: Failed to standardize CASSLRTRTDTQYX: not a valid amino acid
sequence.
    warnings.warn(
/home/yutanagano/Projects/tidytcells/src/tidytcells/aa/_standardize.py:80:
UserWarning: Failed to standardize CASSILGWSEAFX: not a valid amino acid
sequence.
    warnings.warn(
/home/yutanagano/Projects/tidytcells/src/tidytcells/aa/_standardize.py:80:
UserWarning: Failed to standardize CSARTGDRTEAFX: not a valid amino acid
sequence.
    warnings.warn(
/home/yutanagano/Projects/tidytcells/src/tidytcells/aa/_standardize.py:80:
UserWarning: Failed to standardize CALQDXNTGEXFF: not a valid amino acid
sequence.
    warnings.warn(

```

```

[ ]: num_junction_successes = junctions["corrected"].notna().sum()
    num_junction_total = len(junctions)

    where_junction_changed = junctions[junctions["junction"] != _
    ↪junctions["corrected"]]

```

```

num_successful_junction_changes = where_junction_changed["corrected"].notna().
    ↪sum()
num_junction_changes = len(where_junction_changed)

print(f"total number of IMGT-compliant junctions:           ")
    ↪{num_tr_successes}")
print(f"original number of unique junctions:                {num_tr_total}")
print(f"fraction of junctions standardized:                {num_tr_successes/
    ↪ num_tr_total}\n")

print(f"number of junctions originally IMGT-noncompliant:    {num_tr_changes}")
print(f"number of IMGT-noncompliant junctions fixed:         ")
    ↪{num_successful_tr_changes}")
print(f"fraction of IMGT-noncompliant junctions standardized:
    ↪{num_successful_tr_changes / num_tr_changes}")

```

```

total number of IMGT-compliant junctions:           2127
original number of unique junctions:                2225
fraction of junctions standardized:                 0.9559550561797753

number of junctions originally IMGT-noncompliant:    1217
number of IMGT-noncompliant junctions fixed:        1137
fraction of IMGT-noncompliant junctions standardized: 0.934264585045193

```

```
[ ]: junctions.to_csv("junctions.csv", index=False)
```

## 1.5 Test epitope standardization

```
[ ]: epitopes["corrected"] = epitopes["epitope"].map(tidytcells.aa.standardize)
```

```

/home/yutanagano/Projects/tidytcells/src/tidytcells/aa/_standardize.py:80:
UserWarning: Failed to standardize LLFGFPVYV + SCM(F5): not a valid amino acid
sequence.
    warnings.warn(
/home/yutanagano/Projects/tidytcells/src/tidytcells/aa/_standardize.py:80:
UserWarning: Failed to standardize 1-O-(alpha-D-
galactosyl)-N-hexacosanoylphytosphingosine: not a valid amino acid sequence.
    warnings.warn(
/home/yutanagano/Projects/tidytcells/src/tidytcells/aa/_standardize.py:80:
UserWarning: Failed to standardize
5-(2-oxopropylideneamino)-6-D-ribitylaminouracil: not a valid amino acid
sequence.
    warnings.warn(
/home/yutanagano/Projects/tidytcells/src/tidytcells/aa/_standardize.py:80:
UserWarning: Failed to standardize ASQKRPSQRH + ACET(A1): not a valid amino acid
sequence.
    warnings.warn(
/home/yutanagano/Projects/tidytcells/src/tidytcells/aa/_standardize.py:80:

```



```

UserWarning: Failed to standardize LLFGKPVYV + SCM(K5): not a valid amino acid
sequence.
    warnings.warn(
/home/yutanagano/Projects/tidytcells/src/tidytcells/aa/_standardize.py:80:
UserWarning: Failed to standardize LLFGFAVYV + SCM(F5): not a valid amino acid
sequence.
    warnings.warn(
/home/yutanagano/Projects/tidytcells/src/tidytcells/aa/_standardize.py:80:
UserWarning: Failed to standardize LLFGFPVFV + SCM(F5): not a valid amino acid
sequence.
    warnings.warn(
/home/yutanagano/Projects/tidytcells/src/tidytcells/aa/_standardize.py:80:
UserWarning: Failed to standardize 1-0-(4-deoxy-alpha-D-xylo-
hexopyranosyl)-N-hexacosanoylsphinganine: not a valid amino acid sequence.
    warnings.warn(
/home/yutanagano/Projects/tidytcells/src/tidytcells/aa/_standardize.py:80:
UserWarning: Failed to standardize 1-0-(alpha-D-
galactopyranosyl)-N-icosa-11,14-dienoylphytosphingosine: not a valid amino acid
sequence.
    warnings.warn(
/home/yutanagano/Projects/tidytcells/src/tidytcells/aa/_standardize.py:80:
UserWarning: Failed to standardize 1-0-(3-deoxy-alpha-D-
galactopyranosyl)-N-hexacosanoylsphinganine: not a valid amino acid sequence.
    warnings.warn(
/home/yutanagano/Projects/tidytcells/src/tidytcells/aa/_standardize.py:80:
UserWarning: Failed to standardize 1-0-(alpha-D-
glucopyranosyl)-N-icosa-11,14-dienoylphytosphingosine: not a valid amino acid
sequence.
    warnings.warn(
/home/yutanagano/Projects/tidytcells/src/tidytcells/aa/_standardize.py:80:
UserWarning: Failed to standardize 1-0-(alpha-D-
galactopyranosyl)-N-tetracosanylphytosphingosine: not a valid amino acid
sequence.
    warnings.warn(
/home/yutanagano/Projects/tidytcells/src/tidytcells/aa/_standardize.py:80:
UserWarning: Failed to standardize 1-0-(alpha-D-
glucopyranosyl)-N-tetracosanylphytosphingosine: not a valid amino acid sequence.
    warnings.warn(
/home/yutanagano/Projects/tidytcells/src/tidytcells/aa/_standardize.py:80:
UserWarning: Failed to standardize 1-0-(alpha-D-
galactopyranosyl)-N-tetracosanyl-2-aminononane-1,3,4-triol: not a valid amino
acid sequence.
    warnings.warn(
/home/yutanagano/Projects/tidytcells/src/tidytcells/aa/_standardize.py:80:
UserWarning: Failed to standardize 1-0-(4-deoxy-alpha-D-xylo-
hexopyranosyl)-N-hexacosanoylphytosphingosine: not a valid amino acid sequence.
    warnings.warn(
/home/yutanagano/Projects/tidytcells/src/tidytcells/aa/_standardize.py:80:

```

UserWarning: Failed to standardize N-hexacosanoylisoglobotriaosyl ceramide: not a valid amino acid sequence.

```
warnings.warn(  
/home/yutanagano/Projects/tidytcells/src/tidytcells/aa/_standardize.py:80:  
UserWarning: Failed to standardize alpha-D-galactosyl-(1->4)-beta-D-  
galactosyl-(1->4)-beta-D-glucosyl-N-hexacosanoylceramide: not a valid amino acid  
sequence.
```

```
warnings.warn(  
/home/yutanagano/Projects/tidytcells/src/tidytcells/aa/_standardize.py:80:  
UserWarning: Failed to standardize beta-D-galactosyl-(1->4)-beta-D-  
glucosyl-N-(docosanoyl)sphingosine: not a valid amino acid sequence.
```

```
warnings.warn(  
/home/yutanagano/Projects/tidytcells/src/tidytcells/aa/_standardize.py:80:  
UserWarning: Failed to standardize beta-D-  
galactosyl-N-(tetracosanoyl)sphingosine: not a valid amino acid sequence.
```

```
warnings.warn(  
/home/yutanagano/Projects/tidytcells/src/tidytcells/aa/_standardize.py:80:  
UserWarning: Failed to standardize [3]alpha-L-Rhap-(1->2)-alpha-D-  
Galp-(1->3)-alpha-D-GlcpNAc-(1->3)-alpha-L-Rhap(1->]4: not a valid amino acid  
sequence.
```

```
warnings.warn(  
/home/yutanagano/Projects/tidytcells/src/tidytcells/aa/_standardize.py:80:  
UserWarning: Failed to standardize 1-elaidoyl-sn-glycero-3-phosphocholine: not a  
valid amino acid sequence.
```

```
warnings.warn(  
/home/yutanagano/Projects/tidytcells/src/tidytcells/aa/_standardize.py:80:  
UserWarning: Failed to standardize 2-O-oleoyl-3-O-palmitoyl-1-O-alpha-D-  
galactosyl-sn-glycerol: not a valid amino acid sequence.
```

```
warnings.warn(  
/home/yutanagano/Projects/tidytcells/src/tidytcells/aa/_standardize.py:80:  
UserWarning: Failed to standardize 1-O-(alpha-D-  
galactopyranuronosyl)-N-tetradecanoyldihydrosphingosine: not a valid amino acid  
sequence.
```

```
warnings.warn(  
/home/yutanagano/Projects/tidytcells/src/tidytcells/aa/_standardize.py:80:  
UserWarning: Failed to standardize 1-O-(alpha-D-  
galactopyranosyl)-N-hexacosanoyl-D-xylo-phytosphingosine: not a valid amino acid  
sequence.
```

```
warnings.warn(  
/home/yutanagano/Projects/tidytcells/src/tidytcells/aa/_standardize.py:80:  
UserWarning: Failed to standardize (1R)-1,5-anhydro-1-[(3S,4S,5R)-3-  
(hexacosanoylamino)-4,5-dihydroxynonadecyl]-D-galactitol: not a valid amino acid  
sequence.
```

```
warnings.warn(  
/home/yutanagano/Projects/tidytcells/src/tidytcells/aa/_standardize.py:80:  
UserWarning: Failed to standardize 1-O-(6-deoxy-6-benzamido-alpha-D-  
galactopyranosyl)-N-hexacosanoylphytosphingosine: not a valid amino acid  
sequence.
```

```

warnings.warn(
/home/yutanagano/Projects/tidytcells/src/tidytcells/aa/_standardize.py:80:
UserWarning: Failed to standardize 1-O-{6-deoxy-6-[N'-(1-naphthyl)ureido]-alpha-
D-galactopyranosyl}-N-hexacosanoylphytosphingosine: not a valid amino acid
sequence.
warnings.warn(
/home/yutanagano/Projects/tidytcells/src/tidytcells/aa/_standardize.py:80:
UserWarning: Failed to standardize alpha-D-
galactosyl-N-(hexacosanoyl)-11,12-methylene-C22-sphinganine: not a valid amino
acid sequence.
warnings.warn(
/home/yutanagano/Projects/tidytcells/src/tidytcells/aa/_standardize.py:80:
UserWarning: Failed to standardize HS44: not a valid amino acid sequence.
warnings.warn(
/home/yutanagano/Projects/tidytcells/src/tidytcells/aa/_standardize.py:80:
UserWarning: Failed to standardize 2-palmitoyl-1-cis-vaccenoyl-3-alpha-D-
galactosyl-sn-glycerol: not a valid amino acid sequence.
warnings.warn(
/home/yutanagano/Projects/tidytcells/src/tidytcells/aa/_standardize.py:80:
UserWarning: Failed to standardize 1-palmitoyl-2-cis-vaccenoyl-3-alpha-D-
glucosyl-sn-glycerol: not a valid amino acid sequence.
warnings.warn(
/home/yutanagano/Projects/tidytcells/src/tidytcells/aa/_standardize.py:80:
UserWarning: Failed to standardize 1-O-[6-O-(4-pyridylcarbamoyl)-alpha-D-
galactopyranosyl]-N-hexacosanoylphytosphingosine: not a valid amino acid
sequence.
warnings.warn(
/home/yutanagano/Projects/tidytcells/src/tidytcells/aa/_standardize.py:80:
UserWarning: Failed to standardize 1-O-[6-O-(1-naphthylcarbamoyl)-alpha-D-
galactopyranosyl]-N-hexacosanoylphytosphingosine: not a valid amino acid
sequence.
warnings.warn(
/home/yutanagano/Projects/tidytcells/src/tidytcells/aa/_standardize.py:80:
UserWarning: Failed to standardize 1-O-{6-O-[(4-chlorophenyl)carbamoyl]-alpha-D-
galactopyranosyl}-N-hexacosanoylphytosphingosine: not a valid amino acid
sequence.
warnings.warn(
/home/yutanagano/Projects/tidytcells/src/tidytcells/aa/_standardize.py:80:
UserWarning: Failed to standardize 1-O-(alpha-D-
galactopyranosyl)-N-[11-(4-fluorophenyl)undecanoyl]phytosphingosine: not a valid
amino acid sequence.
warnings.warn(
/home/yutanagano/Projects/tidytcells/src/tidytcells/aa/_standardize.py:80:
UserWarning: Failed to standardize GCK127: not a valid amino acid sequence.
warnings.warn(
/home/yutanagano/Projects/tidytcells/src/tidytcells/aa/_standardize.py:80:
UserWarning: Failed to standardize GCK152: not a valid amino acid sequence.
warnings.warn(

```

```

/home/yutanagano/Projects/tidytcells/src/tidytcells/aa/_standardize.py:80:
UserWarning: Failed to standardize alpha-D-
galactosyl-N-[(4Z)-9-(2-decylcyclopropyl)non-4-enoyl]phytosphingosine: not a
valid amino acid sequence.
    warnings.warn(
/home/yutanagano/Projects/tidytcells/src/tidytcells/aa/_standardize.py:80:
UserWarning: Failed to standardize N-[(2S,3S,4R)-1-(alpha-D-
galactosyloxy)-3,4-dihydroxyoctadecan-2-yl]hexacosanethioamide: not a valid
amino acid sequence.
    warnings.warn(
/home/yutanagano/Projects/tidytcells/src/tidytcells/aa/_standardize.py:80:
UserWarning: Failed to standardize 1-(3-O-sulfo-beta-D-
galactosyl)-N-[(15Z)-tetracos-15-enoyl]sphingosine: not a valid amino acid
sequence.
    warnings.warn(
/home/yutanagano/Projects/tidytcells/src/tidytcells/aa/_standardize.py:80:
UserWarning: Failed to standardize 1-(3-O-sulfo-beta-D-
galactosyl)-N-tetracosanoylsphingosine: not a valid amino acid sequence.
    warnings.warn(
/home/yutanagano/Projects/tidytcells/src/tidytcells/aa/_standardize.py:80:
UserWarning: Failed to standardize 1-(3-O-sulfo-beta-D-galactosyl)sphingosine:
not a valid amino acid sequence.
    warnings.warn(
/home/yutanagano/Projects/tidytcells/src/tidytcells/aa/_standardize.py:80:
UserWarning: Failed to standardize 6-deoxy-D-glucos-6-yl corynomycolate: not a
valid amino acid sequence.
    warnings.warn(
/home/yutanagano/Projects/tidytcells/src/tidytcells/aa/_standardize.py:80:
UserWarning: Failed to standardize mycolic acid: not a valid amino acid
sequence.
    warnings.warn(
/home/yutanagano/Projects/tidytcells/src/tidytcells/aa/_standardize.py:80:
UserWarning: Failed to standardize glucose 6-monomycolate (C36): not a valid
amino acid sequence.
    warnings.warn(
/home/yutanagano/Projects/tidytcells/src/tidytcells/aa/_standardize.py:80:
UserWarning: Failed to standardize beta-D-galactosyl-N-(nervonoyl)sphingosine:
not a valid amino acid sequence.
    warnings.warn(
/home/yutanagano/Projects/tidytcells/src/tidytcells/aa/_standardize.py:80:
UserWarning: Failed to standardize reduced
6-(hydroxymethyl)-8-(1-D-ribityl)lumazine: not a valid amino acid sequence.
    warnings.warn(
/home/yutanagano/Projects/tidytcells/src/tidytcells/aa/_standardize.py:80:
UserWarning: Failed to standardize 7-hydroxy-6-methyl-8-(1-D-ribityl)lumazine:
not a valid amino acid sequence.
    warnings.warn(
/home/yutanagano/Projects/tidytcells/src/tidytcells/aa/_standardize.py:80:

```

```

UserWarning: Failed to standardize 6-(hydroxymethyl)-8-(1-D-ribityl)lumazine:
not a valid amino acid sequence.
    warnings.warn(
/home/yutanagano/Projects/tidytcells/src/tidytcells/aa/_standardize.py:80:
UserWarning: Failed to standardize
N(6)-[(2-amino-4-oxo-3,4-dihydropteridin-6-yl)methyl]-D-lysine: not a valid
amino acid sequence.
    warnings.warn(
/home/yutanagano/Projects/tidytcells/src/tidytcells/aa/_standardize.py:80:
UserWarning: Failed to standardize 5-amino-6-(D-ribitylamino)uracil: not a valid
amino acid sequence.
    warnings.warn(
/home/yutanagano/Projects/tidytcells/src/tidytcells/aa/_standardize.py:80:
UserWarning: Failed to standardize
5-(2-oxoethylideneamino)-6-D-ribitylaminouracil: not a valid amino acid
sequence.
    warnings.warn(
/home/yutanagano/Projects/tidytcells/src/tidytcells/aa/_standardize.py:80:
UserWarning: Failed to standardize 6-formylpterin: not a valid amino acid
sequence.
    warnings.warn(
/home/yutanagano/Projects/tidytcells/src/tidytcells/aa/_standardize.py:80:
UserWarning: Failed to standardize N(2)-acetyl-6-formylpterin: not a valid amino
acid sequence.
    warnings.warn(
/home/yutanagano/Projects/tidytcells/src/tidytcells/aa/_standardize.py:80:
UserWarning: Failed to standardize diclofenac: not a valid amino acid sequence.
    warnings.warn(
/home/yutanagano/Projects/tidytcells/src/tidytcells/aa/_standardize.py:80:
UserWarning: Failed to standardize 2-hydroxy-1-naphthaldehyde: not a valid amino
acid sequence.
    warnings.warn(
/home/yutanagano/Projects/tidytcells/src/tidytcells/aa/_standardize.py:80:
UserWarning: Failed to standardize 5-hydroxydiclofenac: not a valid amino acid
sequence.
    warnings.warn(
/home/yutanagano/Projects/tidytcells/src/tidytcells/aa/_standardize.py:80:
UserWarning: Failed to standardize 3-formylsalicylic acid: not a valid amino
acid sequence.
    warnings.warn(
/home/yutanagano/Projects/tidytcells/src/tidytcells/aa/_standardize.py:80:
UserWarning: Failed to standardize 5-methoxysalicylaldehyde: not a valid amino
acid sequence.
    warnings.warn(
/home/yutanagano/Projects/tidytcells/src/tidytcells/aa/_standardize.py:80:
UserWarning: Failed to standardize 2,4-diaminopteridine-6-carbaldehyde: not a
valid amino acid sequence.
    warnings.warn(

```

```

/home/yutanagano/Projects/tidytcells/src/tidytcells/aa/_standardize.py:80:
UserWarning: Failed to standardize LQPFPQQLPYPQ + DEAM(Q8): not a valid amino
acid sequence.
    warnings.warn(
/home/yutanagano/Projects/tidytcells/src/tidytcells/aa/_standardize.py:80:
UserWarning: Failed to standardize PFPQQLPYPQPQ + DEAM(Q6): not a valid amino
acid sequence.
    warnings.warn(
/home/yutanagano/Projects/tidytcells/src/tidytcells/aa/_standardize.py:80:
UserWarning: Failed to standardize 1,2-dioleoyl-3-palmitoylglycerol: not a valid
amino acid sequence.
    warnings.warn(
/home/yutanagano/Projects/tidytcells/src/tidytcells/aa/_standardize.py:80:
UserWarning: Failed to standardize palmitoleyl alcohol: not a valid amino acid
sequence.
    warnings.warn(
/home/yutanagano/Projects/tidytcells/src/tidytcells/aa/_standardize.py:80:
UserWarning: Failed to standardize lauryl palmitoleate: not a valid amino acid
sequence.
    warnings.warn(
/home/yutanagano/Projects/tidytcells/src/tidytcells/aa/_standardize.py:80:
UserWarning: Failed to standardize squalene: not a valid amino acid sequence.
    warnings.warn(
/home/yutanagano/Projects/tidytcells/src/tidytcells/aa/_standardize.py:80:
UserWarning: Failed to standardize methyl palmitoleate: not a valid amino acid
sequence.
    warnings.warn(
/home/yutanagano/Projects/tidytcells/src/tidytcells/aa/_standardize.py:80:
UserWarning: Failed to standardize palmitoleic acid: not a valid amino acid
sequence.
    warnings.warn(
/home/yutanagano/Projects/tidytcells/src/tidytcells/aa/_standardize.py:80:
UserWarning: Failed to standardize beryllium atom: not a valid amino acid
sequence.
    warnings.warn(
/home/yutanagano/Projects/tidytcells/src/tidytcells/aa/_standardize.py:80:
UserWarning: Failed to standardize C32 phosphomycoketide: not a valid amino acid
sequence.
    warnings.warn(
/home/yutanagano/Projects/tidytcells/src/tidytcells/aa/_standardize.py:80:
UserWarning: Failed to standardize
N-[(15Z)-tetracosenoyl]sphing-4-enine-1-phosphocholine: not a valid amino acid
sequence.
    warnings.warn(
/home/yutanagano/Projects/tidytcells/src/tidytcells/aa/_standardize.py:80:
UserWarning: Failed to standardize 1-O-oleoyl-sn-glycero-3-phosphocholine: not a
valid amino acid sequence.
    warnings.warn(

```

```

/home/yutanagano/Projects/tidytcells/src/tidytcells/aa/_standardize.py:80:
UserWarning: Failed to standardize oleic acid: not a valid amino acid sequence.
    warnings.warn(
/home/yutanagano/Projects/tidytcells/src/tidytcells/aa/_standardize.py:80:
UserWarning: Failed to standardize 1-stearoyl-2-oleoyl-sn-
glycero-3-phosphocholine: not a valid amino acid sequence.
    warnings.warn(
/home/yutanagano/Projects/tidytcells/src/tidytcells/aa/_standardize.py:80:
UserWarning: Failed to standardize SGQGSFQPSQQNP + DEAM(Q3, Q11): not a valid
amino acid sequence.
    warnings.warn(
/home/yutanagano/Projects/tidytcells/src/tidytcells/aa/_standardize.py:80:
UserWarning: Failed to standardize PQPQLPYPQPQ + DEAM(Q4, Q11): not a valid
amino acid sequence.
    warnings.warn(
/home/yutanagano/Projects/tidytcells/src/tidytcells/aa/_standardize.py:80:
UserWarning: Failed to standardize FPQPQQFPWPQP + DEAM(Q5): not a valid amino
acid sequence.
    warnings.warn(
/home/yutanagano/Projects/tidytcells/src/tidytcells/aa/_standardize.py:80:
UserWarning: Failed to standardize HCLGKWLGHDPKF + ACET(C2): not a valid amino
acid sequence.
    warnings.warn(
/home/yutanagano/Projects/tidytcells/src/tidytcells/aa/_standardize.py:80:
UserWarning: Failed to standardize HSLGKWLGHDPKF + GLYC(H1): not a valid amino
acid sequence.
    warnings.warn(
/home/yutanagano/Projects/tidytcells/src/tidytcells/aa/_standardize.py:80:
UserWarning: Failed to standardize KAVYNFATM + MCM(F6): not a valid amino acid
sequence.
    warnings.warn(
/home/yutanagano/Projects/tidytcells/src/tidytcells/aa/_standardize.py:80:
UserWarning: Failed to standardize KAVYNFATM + MCM(N5): not a valid amino acid
sequence.
    warnings.warn(
/home/yutanagano/Projects/tidytcells/src/tidytcells/aa/_standardize.py:80:
UserWarning: Failed to standardize ASQYRPSQR + ACET(A1): not a valid amino acid
sequence.
    warnings.warn(
/home/yutanagano/Projects/tidytcells/src/tidytcells/aa/_standardize.py:80:
UserWarning: Failed to standardize ASQKRPSQR + ACET(A1): not a valid amino acid
sequence.
    warnings.warn(
/home/yutanagano/Projects/tidytcells/src/tidytcells/aa/_standardize.py:80:
UserWarning: Failed to standardize ASQYRPSQRHG + ACET(A1): not a valid amino
acid sequence.
    warnings.warn(
/home/yutanagano/Projects/tidytcells/src/tidytcells/aa/_standardize.py:80:

```

```

UserWarning: Failed to standardize ASQARPSQRHG + ACET(A1): not a valid amino
acid sequence.
    warnings.warn(
/home/yutanagano/Projects/tidytcells/src/tidytcells/aa/_standardize.py:80:
UserWarning: Failed to standardize ASQKRPSQRHG + ACET(A1): not a valid amino
acid sequence.
    warnings.warn(
/home/yutanagano/Projects/tidytcells/src/tidytcells/aa/_standardize.py:80:
UserWarning: Failed to standardize ASQARPSQR + ACET(A1): not a valid amino acid
sequence.
    warnings.warn(
/home/yutanagano/Projects/tidytcells/src/tidytcells/aa/_standardize.py:80:
UserWarning: Failed to standardize ASQKRPSQR + AMID(A1, R9): not a valid amino
acid sequence.
    warnings.warn(
/home/yutanagano/Projects/tidytcells/src/tidytcells/aa/_standardize.py:80:
UserWarning: Failed to standardize ASQYRPSQR + AMID(A1, R9): not a valid amino
acid sequence.
    warnings.warn(
/home/yutanagano/Projects/tidytcells/src/tidytcells/aa/_standardize.py:80:
UserWarning: Failed to standardize ASQKRPSQRSK + ACET(A1): not a valid amino
acid sequence.
    warnings.warn(
/home/yutanagano/Projects/tidytcells/src/tidytcells/aa/_standardize.py:80:
UserWarning: Failed to standardize AGQFRPSQR + SCM(G2): not a valid amino acid
sequence.
    warnings.warn(
/home/yutanagano/Projects/tidytcells/src/tidytcells/aa/_standardize.py:80:
UserWarning: Failed to standardize AGQARPSQR + SCM(G2): not a valid amino acid
sequence.
    warnings.warn(
/home/yutanagano/Projects/tidytcells/src/tidytcells/aa/_standardize.py:80:
UserWarning: Failed to standardize ATEGRVRVNSAYQDK + CITR(R7): not a valid amino
acid sequence.
    warnings.warn(
/home/yutanagano/Projects/tidytcells/src/tidytcells/aa/_standardize.py:80:
UserWarning: Failed to standardize ATEGRVRVNSAYQDK + CITR(R5, R7): not a valid
amino acid sequence.
    warnings.warn(
/home/yutanagano/Projects/tidytcells/src/tidytcells/aa/_standardize.py:80:
UserWarning: Failed to standardize ATEGRVRVNSAYQDK + CITR(R5): not a valid amino
acid sequence.
    warnings.warn(
/home/yutanagano/Projects/tidytcells/src/tidytcells/aa/_standardize.py:80:
UserWarning: Failed to standardize alpha-D-galactosyl-N-
tetradecanoylsphinganine: not a valid amino acid sequence.
    warnings.warn(
/home/yutanagano/Projects/tidytcells/src/tidytcells/aa/_standardize.py:80:

```



```

UserWarning: Failed to standardize alpha-D-glucuronosylceramide: not a valid
amino acid sequence.
    warnings.warn(
/home/yutanagano/Projects/tidytcells/src/tidytcells/aa/_standardize.py:80:
UserWarning: Failed to standardize 1-0-[alpha-D-galactosyl-(1->2)-alpha-D-
galactosyl]-N-hexacosanoylphytyosphingosine: not a valid amino acid sequence.
    warnings.warn(
/home/yutanagano/Projects/tidytcells/src/tidytcells/aa/_standardize.py:80:
UserWarning: Failed to standardize phosphatidylinositol tetramannoside: not a
valid amino acid sequence.
    warnings.warn(
/home/yutanagano/Projects/tidytcells/src/tidytcells/aa/_standardize.py:80:
UserWarning: Failed to standardize 1-hexadecanoyl-2-(9Z-octadecenoyl)-sn-
glycero-3-phospho-D-myo-inositol: not a valid amino acid sequence.
    warnings.warn(
/home/yutanagano/Projects/tidytcells/src/tidytcells/aa/_standardize.py:80:
UserWarning: Failed to standardize ESLKISQAVHAAHAEINEAGRAAAAAAK + GLYC(K27): not
a valid amino acid sequence.
    warnings.warn(
/home/yutanagano/Projects/tidytcells/src/tidytcells/aa/_standardize.py:80:
UserWarning: Failed to standardize MLYQHLLPL + OX(M1): not a valid amino acid
sequence.
    warnings.warn(
/home/yutanagano/Projects/tidytcells/src/tidytcells/aa/_standardize.py:80:
UserWarning: Failed to standardize VITAFTEGLK + GLYC(T6): not a valid amino acid
sequence.
    warnings.warn(
/home/yutanagano/Projects/tidytcells/src/tidytcells/aa/_standardize.py:80:
UserWarning: Failed to standardize methoxy mycolic acid: not a valid amino acid
sequence.
    warnings.warn(
/home/yutanagano/Projects/tidytcells/src/tidytcells/aa/_standardize.py:80:
UserWarning: Failed to standardize keto mycolic acid: not a valid amino acid
sequence.
    warnings.warn(
/home/yutanagano/Projects/tidytcells/src/tidytcells/aa/_standardize.py:80:
UserWarning: Failed to standardize
(21E)-3-hydroxy-35-[(icosan-2-yl)oxy]-35-oxo-2-pentacosylpentatriacont-21-enoic
acid: not a valid amino acid sequence.
    warnings.warn(
/home/yutanagano/Projects/tidytcells/src/tidytcells/aa/_standardize.py:80:
UserWarning: Failed to standardize alpha-mycolic acid: not a valid amino acid
sequence.
    warnings.warn(
/home/yutanagano/Projects/tidytcells/src/tidytcells/aa/_standardize.py:80:
UserWarning: Failed to standardize (2R)-2-[(1R)-1-hydroxy-16-[(1R,2S)-2-
[(17R,18R)-17-methoxy-18-methylhexatriacontyl]cyclopropyl]hexadecyl]hexacosanoic
acid: not a valid amino acid sequence.

```

```

warnings.warn(
/home/yutanagano/Projects/tidytcells/src/tidytcells/aa/_standardize.py:80:
UserWarning: Failed to standardize 1-[(9Z)-octadec-9-enoyl]-2-hexadecanoyl-sn-
glycero-3-phospho-(1'-sn-glycerol): not a valid amino acid sequence.
warnings.warn(
/home/yutanagano/Projects/tidytcells/src/tidytcells/aa/_standardize.py:80:
UserWarning: Failed to standardize
{1-0-hexadecanoyl-2-0-[(Z)-octadec-9-enoyl]-sn-glycero-3-phospho}serine: not a
valid amino acid sequence.
warnings.warn(
/home/yutanagano/Projects/tidytcells/src/tidytcells/aa/_standardize.py:80:
UserWarning: Failed to standardize 1-hexadecanoyl-2-(9Z-octadecenoyl)-sn-
glycero-3-phosphocholine: not a valid amino acid sequence.
warnings.warn(
/home/yutanagano/Projects/tidytcells/src/tidytcells/aa/_standardize.py:80:
UserWarning: Failed to standardize 1-hexadecanoyl-2-(9Z-octadecenoyl)-sn-
glycero-3-phosphoethanolamine zwitterion: not a valid amino acid sequence.
warnings.warn(
/home/yutanagano/Projects/tidytcells/src/tidytcells/aa/_standardize.py:80:
UserWarning: Failed to standardize 1-palmitoyl-2-oleoyl-sn-glycero-3-phosphate:
not a valid amino acid sequence.
warnings.warn(
/home/yutanagano/Projects/tidytcells/src/tidytcells/aa/_standardize.py:80:
UserWarning: Failed to standardize 6-deoxy-D-glucos-6-yl (2R,3R)-corynomycolate:
not a valid amino acid sequence.
warnings.warn(
/home/yutanagano/Projects/tidytcells/src/tidytcells/aa/_standardize.py:80:
UserWarning: Failed to standardize QQYPSGQGSFQPSQQNPQ + DEAM(Q7, Q15): not a
valid amino acid sequence.
warnings.warn(
/home/yutanagano/Projects/tidytcells/src/tidytcells/aa/_standardize.py:80:
UserWarning: Failed to standardize 1-0-(alpha-D-
galactosyl)-N-[(15Z)-tetracos-15-enoyl]phytosphingosine: not a valid amino acid
sequence.
warnings.warn(
/home/yutanagano/Projects/tidytcells/src/tidytcells/aa/_standardize.py:80:
UserWarning: Failed to standardize 1-0-(6-acetamido-6-deoxy-alpha-D-
galactosyl)-N-[(15Z)-tetracos-15-enoyl]phytosphingosine: not a valid amino acid
sequence.
warnings.warn(
/home/yutanagano/Projects/tidytcells/src/tidytcells/aa/_standardize.py:80:
UserWarning: Failed to standardize LEQLESIINF EKLA AAAAK + GLYC(K19): not a valid
amino acid sequence.
warnings.warn(
/home/yutanagano/Projects/tidytcells/src/tidytcells/aa/_standardize.py:80:
UserWarning: Failed to standardize 2,4-dinitrophenyl group: not a valid amino
acid sequence.
warnings.warn(

```

```

/home/yutanagano/Projects/tidytcells/src/tidytcells/aa/_standardize.py:80:
UserWarning: Failed to standardize 1-0-(1-0-hexadecanoyl-2-0-heptadecanoyl-sn-
glycero-3-phosphono)-1D-myo-inositol: not a valid amino acid sequence.
    warnings.warn(
/home/yutanagano/Projects/tidytcells/src/tidytcells/aa/_standardize.py:80:
UserWarning: Failed to standardize 1-0-[6-0-(3-phenylpropanoyl)-alpha-D-
galactopyranosyl]-N-hexacosanoylsphinganine: not a valid amino acid sequence.
    warnings.warn(
/home/yutanagano/Projects/tidytcells/src/tidytcells/aa/_standardize.py:80:
UserWarning: Failed to standardize beryllium sulfate: not a valid amino acid
sequence.
    warnings.warn(
/home/yutanagano/Projects/tidytcells/src/tidytcells/aa/_standardize.py:80:
UserWarning: Failed to standardize GVIATRSSAVRLR + CITR(R6): not a valid amino
acid sequence.
    warnings.warn(
/home/yutanagano/Projects/tidytcells/src/tidytcells/aa/_standardize.py:80:
UserWarning: Failed to standardize alpha-galactosylceramide: not a valid amino
acid sequence.
    warnings.warn(
/home/yutanagano/Projects/tidytcells/src/tidytcells/aa/_standardize.py:80:
UserWarning: Failed to standardize PQQPLPY + DEAM(Q4): not a valid amino acid
sequence.
    warnings.warn(
/home/yutanagano/Projects/tidytcells/src/tidytcells/aa/_standardize.py:80:
UserWarning: Failed to standardize PFPQPLPY + DEAM(Q6): not a valid amino acid
sequence.
    warnings.warn(
/home/yutanagano/Projects/tidytcells/src/tidytcells/aa/_standardize.py:80:
UserWarning: Failed to standardize ASGNHAAGILTM + AMID(M97): not a valid amino
acid sequence.
    warnings.warn(
/home/yutanagano/Projects/tidytcells/src/tidytcells/aa/_standardize.py:80:
UserWarning: Failed to standardize HGAGNHAAGILTL + AMID(L66): not a valid amino
acid sequence.
    warnings.warn(
/home/yutanagano/Projects/tidytcells/src/tidytcells/aa/_standardize.py:80:
UserWarning: Failed to standardize QLQFPQPLPY + DEAM(Q9): not a valid amino
acid sequence.
    warnings.warn(
/home/yutanagano/Projects/tidytcells/src/tidytcells/aa/_standardize.py:80:
UserWarning: Failed to standardize LQFPQPLPY + DEAM(Q8): not a valid amino
acid sequence.
    warnings.warn(
/home/yutanagano/Projects/tidytcells/src/tidytcells/aa/_standardize.py:80:
UserWarning: Failed to standardize PQQFPQFP + DEAM(Q9): not a valid amino
acid sequence.
    warnings.warn(

```

```

/home/yutanagano/Projects/tidytcells/src/tidytcells/aa/_standardize.py:80:
UserWarning: Failed to standardize PIPQQPQPYPQ + DEAM(Q4): not a valid amino
acid sequence.
    warnings.warn(
/home/yutanagano/Projects/tidytcells/src/tidytcells/aa/_standardize.py:80:
UserWarning: Failed to standardize phosphatidylglycerol: not a valid amino acid
sequence.
    warnings.warn(
/home/yutanagano/Projects/tidytcells/src/tidytcells/aa/_standardize.py:80:
UserWarning: Failed to standardize 1,2-dioleoyl-3-alpha-D-galactosyl-sn-
glycerol: not a valid amino acid sequence.
    warnings.warn(
/home/yutanagano/Projects/tidytcells/src/tidytcells/aa/_standardize.py:80:
UserWarning: Failed to standardize glucose 6-monomycolate: not a valid amino
acid sequence.
    warnings.warn(
/home/yutanagano/Projects/tidytcells/src/tidytcells/aa/_standardize.py:80:
UserWarning: Failed to standardize 2-O-palmitoyl-2'-O-sulfo-3-O-[(2E,4S,6S,8S)-
2,4,6,8-tetramethyltriacont-2-enoyl]-alpha,alpha-trehalose: not a valid amino
acid sequence.
    warnings.warn(
/home/yutanagano/Projects/tidytcells/src/tidytcells/aa/_standardize.py:80:
UserWarning: Failed to standardize QPPFSQQQPVL + DEAM(Q6, Q8): not a valid
amino acid sequence.
    warnings.warn(
/home/yutanagano/Projects/tidytcells/src/tidytcells/aa/_standardize.py:80:
UserWarning: Failed to standardize PFSQQQPVL + DEAM(Q4, Q6): not a valid amino
acid sequence.
    warnings.warn(
/home/yutanagano/Projects/tidytcells/src/tidytcells/aa/_standardize.py:80:
UserWarning: Failed to standardize K68, D69, H74, A75, L76: not a valid amino
acid sequence.
    warnings.warn(
/home/yutanagano/Projects/tidytcells/src/tidytcells/aa/_standardize.py:80:
UserWarning: Failed to standardize H74, A75, L76, K83, K84: not a valid amino
acid sequence.
    warnings.warn(
/home/yutanagano/Projects/tidytcells/src/tidytcells/aa/_standardize.py:80:
UserWarning: Failed to standardize N-hexadecanoylsphingosine-1-phosphocholine:
not a valid amino acid sequence.
    warnings.warn(
/home/yutanagano/Projects/tidytcells/src/tidytcells/aa/_standardize.py:80:
UserWarning: Failed to standardize phosphatidylglycerol 18:0/18:1: not a valid
amino acid sequence.
    warnings.warn(
/home/yutanagano/Projects/tidytcells/src/tidytcells/aa/_standardize.py:80:
UserWarning: Failed to standardize 1-oleoyl-sn-glycerol 3-phosphate: not a valid
amino acid sequence.

```

```

warnings.warn(
/home/yutanagano/Projects/tidytcells/src/tidytcells/aa/_standardize.py:80:
UserWarning: Failed to standardize maradolipid: not a valid amino acid sequence.
warnings.warn(
/home/yutanagano/Projects/tidytcells/src/tidytcells/aa/_standardize.py:80:
UserWarning: Failed to standardize 1-oleoyl-2-palmitoyl-sn-
glycero-3-phosphocholine: not a valid amino acid sequence.
warnings.warn(
/home/yutanagano/Projects/tidytcells/src/tidytcells/aa/_standardize.py:80:
UserWarning: Failed to standardize phosphatidyl-L-serine: not a valid amino acid
sequence.
warnings.warn(
/home/yutanagano/Projects/tidytcells/src/tidytcells/aa/_standardize.py:80:
UserWarning: Failed to standardize beta-D-GalpNAc-(1->4)-[alpha-
Neup5Gc-(2->3)]-beta-D-Galp-(1->4)-R group: not a valid amino acid sequence.
warnings.warn(
/home/yutanagano/Projects/tidytcells/src/tidytcells/aa/_standardize.py:80:
UserWarning: Failed to standardize 1-hexadecanoyl-2-(9Z-octadecenoyl)-sn-
glycero-3-phosphoethanolamine: not a valid amino acid sequence.
warnings.warn(
/home/yutanagano/Projects/tidytcells/src/tidytcells/aa/_standardize.py:80:
UserWarning: Failed to standardize PIM2: not a valid amino acid sequence.
warnings.warn(
/home/yutanagano/Projects/tidytcells/src/tidytcells/aa/_standardize.py:80:
UserWarning: Failed to standardize phosphatidylinositol: not a valid amino acid
sequence.
warnings.warn(
/home/yutanagano/Projects/tidytcells/src/tidytcells/aa/_standardize.py:80:
UserWarning: Failed to standardize ganglioside GM1: not a valid amino acid
sequence.
warnings.warn(
/home/yutanagano/Projects/tidytcells/src/tidytcells/aa/_standardize.py:80:
UserWarning: Failed to standardize PQQPIPQQPQPYPQQ + DEAM(Q2, Q7): not a valid
amino acid sequence.
warnings.warn(
/home/yutanagano/Projects/tidytcells/src/tidytcells/aa/_standardize.py:80:
UserWarning: Failed to standardize QPFPQPQQPFPW + DEAM(Q7): not a valid amino
acid sequence.
warnings.warn(
/home/yutanagano/Projects/tidytcells/src/tidytcells/aa/_standardize.py:80:
UserWarning: Failed to standardize ILDQVPFSV + NLeu(L2): not a valid amino acid
sequence.
warnings.warn(
/home/yutanagano/Projects/tidytcells/src/tidytcells/aa/_standardize.py:80:
UserWarning: Failed to standardize PQQPLPYPQQ + DEAM(Q4,Q11): not a valid amino
acid sequence.
warnings.warn(
/home/yutanagano/Projects/tidytcells/src/tidytcells/aa/_standardize.py:80:

```

```

UserWarning: Failed to standardize GGYRARPAAAAAT + CITR(R4, R6): not a valid
amino acid sequence.
    warnings.warn(
/home/yutanagano/Projects/tidytcells/src/tidytcells/aa/_standardize.py:80:
UserWarning: Failed to standardize GGYRARPAAAAAT + CITR(R6): not a valid amino
acid sequence.
    warnings.warn(
/home/yutanagano/Projects/tidytcells/src/tidytcells/aa/_standardize.py:80:
UserWarning: Failed to standardize carbamazepine-10,11-epoxide: not a valid
amino acid sequence.
    warnings.warn(
/home/yutanagano/Projects/tidytcells/src/tidytcells/aa/_standardize.py:80:
UserWarning: Failed to standardize carbamazepine: not a valid amino acid
sequence.
    warnings.warn(
/home/yutanagano/Projects/tidytcells/src/tidytcells/aa/_standardize.py:80:
UserWarning: Failed to standardize oxcarbazepine: not a valid amino acid
sequence.
    warnings.warn(
/home/yutanagano/Projects/tidytcells/src/tidytcells/aa/_standardize.py:80:
UserWarning: Failed to standardize dapsone: not a valid amino acid sequence.
    warnings.warn(
/home/yutanagano/Projects/tidytcells/src/tidytcells/aa/_standardize.py:80:
UserWarning: Failed to standardize nitroso-dapsone: not a valid amino acid
sequence.
    warnings.warn(
/home/yutanagano/Projects/tidytcells/src/tidytcells/aa/_standardize.py:80:
UserWarning: Failed to standardize 3-alpha-D-
glucuronosyl-2-palmitoyl-1-[(10R)-10-methyloctadecanoyl]-sn-glycerol: not a
valid amino acid sequence.
    warnings.warn(
/home/yutanagano/Projects/tidytcells/src/tidytcells/aa/_standardize.py:80:
UserWarning: Failed to standardize 2-palmitoyl-1-cis-vaccenoyl-3-alpha-D-
glucosyl-sn-glycerol: not a valid amino acid sequence.
    warnings.warn(
/home/yutanagano/Projects/tidytcells/src/tidytcells/aa/_standardize.py:80:
UserWarning: Failed to standardize 1-palmitoyl-2-cis-vaccenoyl-3-alpha-D-
galactosyl-sn-glycerol: not a valid amino acid sequence.
    warnings.warn(
/home/yutanagano/Projects/tidytcells/src/tidytcells/aa/_standardize.py:80:
UserWarning: Failed to standardize 1-alpha-D-
glucuronosyl-N-[(2R)-2-hydroxytridecanoyl]sphinganine: not a valid amino acid
sequence.
    warnings.warn(
/home/yutanagano/Projects/tidytcells/src/tidytcells/aa/_standardize.py:80:
UserWarning: Failed to standardize 3-alpha-D-
glucuronosyl-2-[(10R)-10-methyloctadecanoyl]-1-palmitoyl-sn-glycerol: not a
valid amino acid sequence.

```

```
warnings.warn(
/home/yutanagano/Projects/tidytcells/src/tidytcells/aa/_standardize.py:80:
UserWarning: Failed to standardize SHLVEALYLVCGERGFFYTPK + CITR(R14): not a
valid amino acid sequence.
warnings.warn(
/home/yutanagano/Projects/tidytcells/src/tidytcells/aa/_standardize.py:80:
UserWarning: Failed to standardize LLSYFGTPT + METH(Y4): not a valid amino acid
sequence.
warnings.warn(
/home/yutanagano/Projects/tidytcells/src/tidytcells/aa/_standardize.py:80:
UserWarning: Failed to standardize LLSYFGTPT + SCM(Y4): not a valid amino acid
sequence.
warnings.warn(
/home/yutanagano/Projects/tidytcells/src/tidytcells/aa/_standardize.py:80:
UserWarning: Failed to standardize 6,7-dimethyl-8-(1-D-ribityl)lumazine: not a
valid amino acid sequence.
warnings.warn(
```

```
[ ]: num_epitope_successes = epitopes["corrected"].notna().sum()
num_epitope_total = len(epitopes)

where_epitope_changed = epitopes[epitopes["epitope"] != epitopes["corrected"]]
num_successful_epitope_changes = where_epitope_changed["corrected"].notna().
    ↳sum()
num_epitope_changes = len(where_epitope_changed)

print(f"total number of standardized epitopes: {num_tr_successes}")
print(f"original number of unique epitopes: {num_tr_total}")
print(f"fraction of epiopes standardized: {num_tr_successes /
    ↳num_tr_total}\n")

print("Currently no capacity to fix nonstandard amino acid sequences")
```

```
total number of standardized epitopes: 2127
original number of unique epitopes: 2225
fraction of epiopes standardized: 0.9559550561797753
```

Currently no capacity to fix nonstandard amino acid sequences

```
[ ]: epitopes.to_csv("epitopes.csv", index=False)
```

```
[ ]:
```
